# COALIA: a computational model of human EEG for consciousness research

Siouar Bensaid<sup>1,\*</sup>, Julien Modolo<sup>1,\*</sup>, Isabelle Merlet<sup>1</sup>, Fabrice Wendling<sup>1,+</sup>, Pascal Benquet<sup>1</sup>

<sup>1</sup>Univ Rennes, INSERM, LTSI – U1099, F-35000 Rennes, France

\* **Co-first authors**

+**Correspondence:**

Fabrice Wendling

fabrice.wendling@inserm.fr

**Keywords: computational modeling, brain connectivity, feedforward inhibition, GABA, disinhibition, TMS-EEG, disorders of consciousness (DOC).**

## Abstract

Understanding the origin of the main physiological processes involved in consciousness is a major challenge of contemporary neuroscience, with crucial implications for the study of Disorders of Consciousness (DOC). The difficulties in achieving this task include the considerable quantity of experimental data in this field, along with the non-intuitive, nonlinear nature of neuronal dynamics. One possibility of integrating the main results from the experimental literature into a cohesive framework, while accounting for nonlinear brain dynamics, is the use of physiologically-inspired computational models. In this study, we present a physiologically-grounded computational model, attempting to account for the main micro-circuits identified in the human cortex, while including the specificities of each neuronal type. More specifically, the model accounts for thalamo-cortical (vertical) regulation of cortico-cortical (horizontal) connectivity, which is a central mechanism for brain information integration and processing. The distinct neuronal assemblies communicate through feedforward and feedback excitatory and inhibitory synaptic connections implemented in a template brain accounting for long-range connectome. The EEG generated by this physiologically-based simulated brain is validated through comparison with brain rhythms recorded in humans in two states of consciousness (wakefulness, sleep). Using the model, it is possible to reproduce the local disynaptic disinhibition of basket cells (fast GABAergic inhibition) and glutamatergic pyramidal neurons through long-range activation of VIP interneurons that induced inhibition of SST interneurons. The model (COALIA) predicts that the strength and dynamics of the thalamic output on the cortex control the local and long-range cortical processing of information. Furthermore, the model reproduces and explains clinical results regarding the complexity of transcranial magnetic stimulation TMS-evoked EEG responses in DOC patients and healthy volunteers, through a modulation of thalamo-cortical connectivity that governs the level of cortico-cortical communication. This new model provides a quantitative framework to accelerate the study of the physiological mechanisms involved in the emergence, maintenance and disruption (sleep, anesthesia, DOC) of consciousness.

## 39 1 Introduction

40 The characterization and understanding of the mechanisms underlying consciousness is one, if not  
41 the greatest challenge that contemporary neuroscience is facing. Beyond the purely fundamental  
42 interest of this question, a major clinical issue is also at stake: evaluating residual consciousness in  
43 patients suffering from Disorders of Consciousness (DOC), which can be extremely difficult, and  
44 have crucial implications in terms of clinical care. For example, motor imagery paradigms can reveal  
45 covert consciousness in coma patients, using functional magnetic resonance imaging (fMRI) (Owen,  
46 Coleman et al. 2006) for instance. This illustrates the pressing need for an improved characterization  
47 of the mechanisms that underlie consciousness, which could be exploited to propose novel quantified  
48 measures, or *metrics*, of consciousness.

49 Many theories have attempted, at various levels of description, to integrate the multifaceted aspects  
50 of consciousness. One of the first theories that found a significant echo in the neuroscience  
51 community is the Dynamic Core Hypothesis (Tononi and Edelman 1998), which was the first to  
52 relate the concept of information with consciousness. In this theory, functional clusters in the  
53 thalamocortical system are central, and involve fast re-entrant interactions, as well as a high level of  
54 integration and differentiation giving rise to complex patterns of neuronal activity. Another popular  
55 theory that has been gradually expanded over the years, and that has solid ties with neurophysiology,  
56 is the Global Workspace Theory (GWT) (Dehaene, Kerszberg et al. 1998, Dehaene and Changeux  
57 2011). In short, GWT states that conscious information is globally available within the brain, and that  
58 the “ignition” of large-scale networks, i.e. the sudden communication between distant brain regions  
59 to engage into the processing of information, enables a stimulus to reach the global workspace, hence  
60 consciousness. Ignition is thought to involve long-range glutamatergic fibers that enable long-  
61 distance communication between cortical regions. Several experiments have supported GWT, for  
62 example that non-masked words involve the activation of much wider networks as compared to  
63 masked words (Dehaene, Naccache et al. 2001), with a similar result found for sub-liminal versus  
64 supra-threshold visual stimuli (Modolo, Hassan et al. 2018, van Vugt, Dagnino et al. 2018). The  
65 Integrated Information Theory (IIT) is based on a different approach. Instead of beginning from the  
66 large-scale structure of the thalamo-cortical system as in the DCH and GWT, IIT introduces several  
67 axioms to derive general principles of consciousness. One of the leading ideas of IIT is that  
68 consciousness involves the *integration* of information between distant areas (reminiscent of ignition  
69 in GWT), which increases the complexity of the processed information. Segregation, or  
70 *differentiation* of information, is also key in IIT: for example, large-scale synchronization of several  
71 regions with the same activity is indeed integrated, however with low complexity (Koch, Massimini  
72 et al. 2016). Therefore, *integration* and *differentiation* appear as the two concepts leading to  
73 increasing the *complexity* of the information conveyed by brain-scale networks. A more recent theory  
74 named algorithmic information theory of consciousness a.k.a. Kolmogorov Theory (KT) (Ruffini  
75 2017) is also based on the idea that conscious states are associated with higher levels of complexity,  
76 and that subjective experience occurs following processes of information compression.

77 In contrast with the aforementioned theoretical studies of consciousness, only few studies have  
78 actually attempted to simulate brain activity associated with consciousness states using  
79 neurophysiologically-plausible computational models. Obviously, the *in silico* implementation of  
80 neural mechanisms that underlie the emergence and maintenance of consciousness represents a  
81 considerable challenge. However, capturing the main features of the most significant common  
82 principles from the main theories of consciousness using a computational neuroscience framework  
83 appears at reach. For example, a computational model exploring how cortico-cortical connectivity is  
84 functionally impaired during sleep (“connectivity breakdown”) has been proposed (Esser, Hill et al.

85 2009). However, most of these models are limited in terms of spatial scale and the represented micro-  
86 circuitry. This limitation hinders bridging the micro-circuit scale with the brain-scale, which is of  
87 interest in consciousness. The present study proposes to fill this gap, and provides new links between  
88 different levels of description (from local neuronal population to whole-brain scale).

89 Using a bottom-up approach, we developed a new computational model of brain-scale  
90 electrophysiological activity. The model starts from neuronal micro-circuits involving different  
91 cellular subtypes that have been reliably identified through neurobiological studies. The basic unit of  
92 the model is the neural mass, representing a local population of a few thousands of neurons, which  
93 has proven its ability to capture the dynamics of actual neuronal assemblies (Wendling, Bartolomei et  
94 al. 2002). At the local level, the model includes subsets of pyramidal neurons (glutamatergic), and  
95 three different types of interneurons (GABAergic) with appropriate physiologically-based kinetics  
96 (fast vs. slow). At the global level, the large-scale model is then constructed on the basis of a standard  
97 66-region brain atlas (Desikan, Segonne et al. 2006), with one neural mass representing the local  
98 field activity of one atlas region. Neural masses are spatially distributed over the cortex, using the  
99 template brain morphology (Colin). As they account for distinct cortical regions, neural masses are  
100 synaptically connected through long-range glutamatergic projections among pyramidal neurons and  
101 GABAergic interneurons. Connectivity is derived from DTI (Diffusion Tensor Imaging) data.  
102 Results show that the model captures the large-scale structure of brain connectivity between regions,  
103 while accounting for the properties of local micro-circuits. It can accurately reproduce EEG activity  
104 for different conscious states (e.g., sleep vs. wake), and the breakdown of functional connectivity  
105 during sleep as assessed through the replication of TMS-EEG experiments.

106 In this article, we first describe basic concepts of cortico-cortical and thalamo-cortical networks  
107 involved in theories of consciousness. Then, we present the neural mass modeling approach used to  
108 develop the brain-scale model, along with the various microcircuits considered and their functional  
109 role. A toy model involving a limited number of neuronal populations is then investigated in order to  
110 validate the implemented micro-circuits, before an extension to the whole-brain model. Simulated  
111 responses to TMS are generated and quantified in two consciousness states, namely awake and  
112 asleep. Results are discussed according to the novelty, performance and limitations of the model,  
113 along with its usefulness in consciousness studies. Future extensions are described.

## 114 **2 Background: role of cortico- and thalamo-cortical networks in consciousness**

115 Consciousness is a global functional state of the brain that is intrinsically linked with neuronal  
116 oscillations generated by large-scale cortico-cortical and thalamo-cortical networks (Llinas, Ribary et  
117 al. 1998). More specifically, wakefulness is determined by widespread thalamocortical projections  
118 (Timofeev and Steriade 1996, Laureys 2004) while awareness requires the activation of a wide  
119 cortico-cortical network, involving lateral and medial frontal regions parieto-temporal and posterior  
120 parietal areas, bilaterally (Laureys, Goldman et al. 1999). In the model, we included these two key  
121 components of consciousness that are briefly reviewed below.

### 122 **2.1 “Horizontal” cortico-cortical connectivity**

123 Functional connectivity studies have shed light on the functional networks involved in various  
124 conscious states (Jin and Chung 2012). During general anesthesia-induced loss of consciousness,  
125 there is a breakdown in cortical effective connectivity (Ferrarelli, Massimini et al. 2010, Hudetz  
126 2012, Gomez, Phillips et al. 2013). As a reminder, effective connectivity is defined as the ability of a  
127 neuronal group to causally affect the firing of other neuronal groups (Friston 2011). In unresponsive

128 patients, impaired consciousness was associated with altered effective connectivity (Varotto, Fazio et  
129 al. 2014, Crone, Schurz et al. 2015). A protocol of TMS triggered a simple local EEG response  
130 indicating a breakdown of effective connectivity at the cortical level, similar to the one previously  
131 observed in unconscious sleeping or anaesthetized subjects (Casali, Gosseries et al. 2013). Sleep  
132 stages have a drastic impact on consciousness and also on functional connectivity. For example, there  
133 is a strong reduction of both wakefulness and awareness components of consciousness during NREM  
134 sleep, associated with thalamic up-and-down state and cortical slow wave sleep. However, brain  
135 effective connectivity changes significantly (Tononi and Sporns 2003, Esser, Hill et al. 2009). More  
136 specifically, cortical activations become more local and stereotypical upon falling into NREM sleep,  
137 which indicates an impaired effective cortical connectivity (Massimini, Ferrarelli et al. 2010).  
138 “Horizontal” communication through coherence that involves high frequency oscillations  
139 synchronization is a fundamental mechanism in cortical function and perception (Fries 2005, Fries  
140 2009). Overall, the “awareness” component of consciousness depends on large-scale synchronized  
141 communication among distant neuronal populations distributed over the neocortex (see Figure 1A,  
142 left panel).

## 143 **2.2 “Vertical” thalamo-cortical connectivity**

144 As reported in IIT (Tononi 2004, Tononi 2012), consciousness depends on the brain's ability to  
145 integrate information, which relies on the effective connectivity among functionally specialized  
146 regions (or clusters) of the thalamocortical system, and on the segregation of information. One  
147 important modulator of cortical connectivity is the activity pattern of thalamocortical cells, tonic vs  
148 up-and down, which is able to modify the excitability level of cortical neuron subpopulations. The  
149 thalamic-mediated synchronization of distant cortical areas may coordinate the large-scale integration  
150 of information across multiple cortical circuits, consequently influencing the level of arousal and  
151 consciousness (Saalman 2014). Conversely, during sleep or anesthesia-induced transitions in  
152 consciousness, both thalamo-cortical and intra-thalamic functional connectivity are modified (Kim,  
153 Hwang et al. 2012, Hale, White et al. 2016). In addition, thalamic input to neocortex modifies  
154 cortico-cortical connectivity. Upon falling into NREM sleep (when rhythmic thalamo-cortical up-  
155 and-down activity develops), cortical activations become more local and stereotypical, indicating a  
156 significant decrease of cortico-cortical connectivity (Esser, Hill et al. 2009, Massimini, Ferrarelli et  
157 al. 2010, Usami, Matsumoto et al. 2015). Recently, it was shown that direct and tonic optogenetic  
158 activation of thalamic reticular nuclei (TRN) GABAergic interneurons induces a spatially restricted  
159 cortical slow wave activity (Lewis, Voigts et al. 2015). This activity was reminiscent of sleep  
160 rhythms, and animals exhibited behavioral changes that were consistent with a decrease of arousal.

161 Overall, this brief literature review suggests that both components of consciousness, namely  
162 awareness and wakefulness, are impaired when large-scale cortico-cortical functional connectivity  
163 mediated through the binding of synchronized high-frequency oscillations in the beta-gamma band  
164 (Schoenberg, Ruf et al. 2018) and regulated through the thalamus is (Nakajima and Halassa 2017).  
165 Meanwhile, during this decrease of awareness and wakefulness, an increase of “vertical” thalamo-  
166 cortical connectivity is observed, along with a stronger synchronization of delta oscillations between  
167 TC cell assemblies and isolated groups of neocortical neurons (Hill and Tononi 2005) (Figure 1A,  
168 right panel).

## 169 **3 Materials and Methods**

### 170 **3.1 Modeling of micro- and macro-circuits: neural mass model approach**

171 Neural mass models (NMMs) are a mathematical description of neural dynamics at a mesoscopic  
172 scale (from a millimeter to several centimeters of the cortex). This class of models was proposed in  
173 the 1970's as an alternative to detailed microscopic models that require a more extensive  
174 computational cost (Wilson and Cowan 1973, Nunez 1974, Lopes da Silva, van Rotterdam et al.  
175 1976, Freeman 1978). NMMs can indeed model the local field potential (LFP) of an entire cortical  
176 region using only few state variables (Breakspear 2017), whereas in detailed models this activity is  
177 meticulously described at the level of spatially distributed and interconnected neuron models, each  
178 including the properties of ionic channels, axons and dendrites (Wang and Buzsáki 1996,  
179 Whittington, Traub et al. 2000, Maex and De Schutter 2007).

180 Despite their simplicity, NMMs are neurophysiologically grounded, since they include the  
181 connectivity, synaptic kinetics and firing rates of neuronal sub-types present in the region of interest.  
182 The reduced complexity and performance (in term of reproducing actual LFPs) of the NMM  
183 approach made it a powerful tool to investigate various cerebral mechanisms, such as the generation  
184 of brain rhythms (Jansen and Rit 1995, David and Friston 2003, Ursino, Cona et al. 2010). NMMs  
185 have also been extensively used to study pathological dynamics such as in epilepsy (Wendling,  
186 Bartolomei et al. 2002, Traub, Contreras et al. 2005, Molaee-Ardekani, Benquet et al. 2010) (for a  
187 review, see (Wendling, Benquet et al. 2016)), Alzheimer's disease (Bhattacharya, Coyle et al. 2011)  
188 and Parkinson's disease (Liu, Wang et al. 2016, Liu, Zhu et al. 2017).

189 Designing a NMM involves identifying the main subsets of neurons implied in the modeled brain  
190 tissue and describing their synaptic interconnections. Based on an exhaustive literature review, we  
191 developed a models consisting of coupled NMMs able to simulate both cortical and thalamic activity,  
192 as described hereafter.

### 193 **3.2 A local neural mass model of neocortical activity**

194 Until recently, the classification of GABAergic interneurons was a highly challenging task, regarding  
195 the electrophysiological properties, morphology, biochemistry markers and connectivity. However,  
196 all recent studies converge towards much simpler functional categories, involving three main classes  
197 of GABAergic interneurons in the neocortex (Rudy, Fishell et al. 2011). As briefly reviewed below,  
198 these classes account for (1) somatic-targeting parvalbumine positive ( $PV^+$ ) basket cells (BC), (2)  
199 dendritic-targeting somatostatin positive (SST) interneurons and (3) vasoactive intestinal-peptide-  
200 (VIP) expressing interneurons (Tremblay, Lee et al. 2016), (Figure 1B, left panel).

#### 201 **3.2.1 Basket cells and fast oscillations**

202  $PV^+$  participate to the generation of cortical gamma oscillations through: 1) thalamocortical  
203 feedforward inhibition in layer 4; 2) feedback inhibition in layer 2/3; and 3) via direct  $PV^+/PV^+$   
204 coupling through electrical gap-junctions (Povysheva, Zaitsev et al. 2008, Buzsáki and Wang 2012,  
205 Lewis, Curley et al. 2012, Varga, Oijala et al. 2014, Womelsdorf, Valiante et al. 2014, Chen, Zhang  
206 et al. 2017). Recent optogenetic experiments have demonstrated the causal role of somatic-targeting  
207 interneurons BC in mediating fast oscillations ( $> 20$  Hz)(Chen, Zhang et al. 2017).

#### 208 **3.2.2 Surround inhibition by SST GABAergic interneurons and slow oscillations**

209 Neocortical SST neurons can exhibit high levels of spontaneous slow oscillations, and their tonic  
210 activity might facilitate fine scale up-and down regulation of global inhibition levels in the neocortex  
211 (Urban-Ciecko and Barth 2016). Lateral inhibition is a fundamental principle in neuronal networks  
212 (Harris and Mrsic-Flogel 2013, Karnani, Agetsuma et al. 2014, Harris and Gordon 2015). Lateral

213 inhibition between nearby pyramidal cells (PCs) is thought to work through SST interneurons  
214 (Kapfer, Glickfeld et al. 2007, Silberberg and Markram 2007, Adesnik, Bruns et al. 2012). Dendritic  
215 inhibition is more effective than perisomatic inhibition in regulating excitatory synaptic integration,  
216 therefore SSTs are the key regulator of input-output transformations (Lovett-Barron, Turi et al.  
217 2012). Furthermore, the slow kinetics of dendritic-targeting inhibitory postsynaptic membrane  
218 potentials (IPSPs) are particularly suited to maximize the localized shunting inhibition effect (Gidon  
219 and Segev 2012, Paulus and Rothwell 2016). Finally, it was shown that this cell type is especially  
220 involved in slow oscillations (Womelsdorf, Valiante et al. 2014, Urban-Ciecko and Barth 2016,  
221 Funk, Peelman et al. 2017).

### 222 3.2.3 Cortical column communication through VIP-controlled disinhibition

223 The disinhibition of cortical PCs gates information flow through and between cortical columns  
224 (Walker, Möck et al. 2016). One of the factors underlying this PC disinhibition is the inhibition of  
225 SST cells during active cortical processing, which enhances distal dendritic excitability (Gentet,  
226 Kremer et al. 2012). The activation of VIP neurons strongly inhibits dendritic-targeting SST  
227 interneurons mediating surround inhibition, which leads to PCs disinhibition (suppress the inhibition  
228 on PCs) (Lee, Kruglikov et al. 2013, Pi, Hangya et al. 2013, Fu, Tucciarone et al. 2014, Pfeffer 2014,  
229 Yang, Murray et al. 2016). This disinhibitory mechanism of disinhibition seems to be a generic motif  
230 able to suppress the blanket of inhibition mediated by SST neurons (Fino and Yuste 2011, Karnani,  
231 Agetsuma et al. 2014). It has been demonstrated indeed in motor, sensory and associative neocortical  
232 areas that transient SST activity suppression by VIP activation occurs during visual processing (Lee  
233 and Mihalas 2017), somatosensory integration (Lee, Kruglikov et al. 2013, Sohn, Okamoto et al.  
234 2016), locomotion (Dipoppa, Ranson et al. 2018), top-down modulation (Ayzenshtat, Karnani et al.  
235 2016) and plasticity during perceptual learning (Williams and Holtmaat 2018). Since VIP neurons are  
236 targeted by long-range cortical glutamatergic projections, they represent a key factor for distal  
237 cortico-cortical activation through disinhibitory disynaptic disinhibition.

238

### 239 3.2.4 Formal description of neocortical model

240 Based on the above information, we have developed a neocortical module involving PCs and three  
241 types of inhibitory subpopulations, namely, BC, SST and VIP (see **Error! Reference source not**  
242 **found.**B, left panel). BC and SST receive excitatory inputs from PCs that are reciprocally inhibited  
243 by both of them. Pyramidal collateral excitation was also implemented *via* an excitatory feedback  
244 loop passed by a supplementary excitatory population (PC') analogous to PC, except that it projects  
245 only from and to subpopulation PC. The electrical gap-junction mentioned in section 3.2.1 was  
246 implemented through an inhibitory feedback loop characterized by a connectivity constant  $C_{BC}^n$ ,  
247 where  $n$  is the index of the NMM. Communication through disinhibition mentioned in section 3.2.3  
248 was modeled by inhibitory projections; first from VIP to SST, and second, from the latter to BC. The  
249 nonspecific influence from neighboring and distant populations was modeled by a Gaussian input  
250 noise corresponding to an excitatory input  $p_c^n(t)$  that globally describes the average density of  
251 afferent action potentials. The set of ordinary differential equations (ODEs) modeling the neocortical  
252 module is included as a Supplementary Material (see Supplementary section 1.1).

## 253 3.3 A local neural mass model of thalamic activity

254 The thalamus is considered as a complex relay extensively connected with the cortex, as well as most  
255 subcortical areas. This central position underlies its key role in several cognitive functions including  
256 perception, attention, memory and consciousness. Importantly, even a limited damage in the  
257 thalamus can have major consequences on all the aforementioned functions (Ward 2013). The

258 thalamo-cortical circuitry as a neural correlate of consciousness has been mentioned by  
259 consciousness theories. More evidence for this role was provided by a study analyzing the metabolic  
260 activity of posterior midline cortical areas driven by the thalamic nuclei, across different altered  
261 consciousness states (Laureys, Boly et al. 2006). The authors reported that unresponsive wakefulness  
262 syndrome (UWS) patients can be differentiated from minimally conscious state (MCS) patients by a  
263 difference in glucose metabolism in these areas. The pivotal role of thalamo-cortical loop in the  
264 generation of slow waves and the up-and-down state was appraised in the review of Crunelli et al.  
265 (Crunelli, David et al. 2015) where they enumerated the main lines of evidence supporting this  
266 assertion, namely, the strong interconnection between thalamic cells (TCs) and neocortical layers  
267 involved in slow waves suggesting that thalamic nuclei can control up-and-down state dynamics in  
268 neocortical circuits, the early TC firing in relation to the initiation of cortical UP states, the rhythmic  
269 up-and-down state generated by TC neurons and TRN in isolated conditions, and the neocortical UP  
270 states readily induced in head-restrained mice by selective optogenetic activation of TC neurons  
271 proving the stimuli role of the latter.

272 The importance of thalamo-cortical connectivity has motivated the development of thalamo-cortical  
273 models simulating the interactions between the cortex and thalamus at a mesoscopic level  
274 (Suffczynski, Kalitzin et al. 2004, Sotero, Trujillo-Barreto et al. 2007, Bhattacharya, Coyle et al.  
275 2011, Roberts and Robinson 2012, Mina, Benquet et al. 2013, Sen Bhattacharya, Cakir et al. 2013,  
276 Cona, Lacanna et al. 2014). While some models were developed to generate alpha activity (8-12 Hz)  
277 (Sotero, Trujillo-Barreto et al. 2007, Bhattacharya, Coyle et al. 2011, Sen Bhattacharya, Cakir et al.  
278 2013), others were used to simulate the sleep-wake cycle (Suffczynski, Kalitzin et al. 2004, Roberts  
279 and Robinson 2012, Cona, Lacanna et al. 2014).

280 Since our aim is to develop a computational model able to reproduce brain rhythms corresponding to  
281 different consciousness states (e.g. sleep-wake cycle), the inclusion of the thalamus in the model is  
282 crucial. A description of the thalamus model is provided in **Error! Reference source not found.**  
283 The thalamic module includes one population of excitatory glutamatergic neurons TCs, and two  
284 inhibitory interneurons from the TRN,  $TRN_1$  and  $TRN_2$  accounting for fast and slow GABAergic  
285 IPSPs, respectively. TCs receive GABAergic IPSPs with slow and fast kinetics from the TRNs,  
286 whereas the latter receive excitatory inputs from the former. Similarly to the cortical module, a  
287 Gaussian input noise corresponding to excitatory input  $p_{Th}^n(t)$  was used to represent nonspecific  
288 inputs on TCs. The set of ODEs modeling the thalamic module is provided as a Supplementary  
289 Material (see Supplementary section 1.2).

## 290 **3.4 Modeling of large-scale cortico-cortical and thalamo-cortical connectivity**

### 291 **3.4.1 Cortico-cortical connections**

292 PCs originating from a single cortical column target several cell types in distant cortical columns.  
293 Glutamatergic PCs target not only remote PCs by common feedforward excitation, but also  
294 GABAergic cells by disynaptic cortico-cortical feedforward inhibition (FFI)(see Figure 2). Even if  
295  $PV^+$  BCs have been shown to receive stronger thalamocortical and intracortical excitatory inputs than  
296 SST neurons, it appears that cortico-cortical FFI could be mediated by both types of interneurons  
297 (Ma, Liu et al. 2010, Tremblay, Lee et al. 2016). Importantly, cortico-cortical glutamatergic axons  
298 also target VIP neurons (Sohn, Okamoto et al. 2016).

299 Therefore, feedforward excitation was included in the model by means of a connectivity constant  
300  $K_{P,P}^{i,j}$  modeling the average strength of glutamatergic projections from pyramidal subpopulations in

301 NMM “*i*” to their counterpart in NMM “*j*”. Disynaptic cortico-cortical feedforward inhibition was  
302 similarly integrated *via* the connectivity constants  $K_{P,BC}^{i,j}$ ,  $K_{P,SST}^{i,j}$  and  $K_{P,VIP}^{i,j}$  denoting glutamatergic  
303 projections from PC subpopulations in NMM “*i*” to BC, SST and VIP in NMM “*j*”, respectively. The  
304 set of ODEs modeling the cortico-cortical connections is included as a Supplementary Material (see  
305 Supplementary section 1.3, equations (9)-(12)).

306 In long-range cortico-cortical connections, the time-delay between NMMs “*i*” and “*j*” was controlled  
307 by a distance parameter  $D^{i,j}$  that reports the Cartesian distance in centimeters (cm) between the two  
308 populations. By setting the conduction velocity of action potentials in the brain to  $c$  ( $c \in$   
309  $[10, 100]$  cm/s), the time-delay taken by NMM “*j*” to receive a firing rate is straightforwardly  
310 deduced as  $D^{i,j}/c$ .

### 311 **3.4.2 Thalamo-cortical connections**

312 The main connections between the thalamus and neocortex were taken into consideration in the  
313 model (see Figure 2). As in classical thalamocortical models, TCs receive glutamatergic excitatory  
314 postsynaptic potentials (EPSPs) from PCs. In turn, PCs receive excitatory input from TCs. Similarly,  
315 TRNs also receive excitatory cortical projections. In terms of GABAergic cortical targets, thalamic  
316 projections mainly target PV<sup>+</sup> basket cells (Cruikshank, Lewis et al. 2007, Yang, Carrasquillo et al.  
317 2013). In the adult brain, thalamic projections onto SST neurons are present but are much weaker as  
318 compared to the projections onto PCs and PV<sup>+</sup> cells (Ji, Zingg et al. 2016). However, robust  
319 thalamocortical activation of non-Martinotti dendritic-targeting GABAergic interneurons has been  
320 demonstrated (Tan, Hu et al. 2008). Long-range connections from cortical areas and/or thalamic  
321 nucleus areas can activate VIP neurons, which in turn inhibit SST neurons, and disinhibit PCs  
322 dendrites. Such dendritic disinhibitory circuit has been proposed to gate excitatory inputs targeting  
323 pyramidal dendrites (Yang, Murray et al. 2016, Williams and Holtmaat 2018). Note that the thalamic  
324 compartment implements FFI, since it induces first an EPSP (PCs activation) followed later on by an  
325 IPSP (cortical interneurons activation).

326 Since only one thalamic population was considered in this model, the TC projections to - and from -  
327 PCs were included in the model. Connectivity constants  $K_{Th,P}^n$  and  $K_{P,Th}^n$ , allow to adjust the strength  
328 of efferent TC projections to PCs of NMM “*n*” and efferent pyramidal projections from the NMM  
329 “*n*” to TC, respectively. Projections from PCs of NMM “*n*” onto TRN<sub>1</sub> and TRN<sub>2</sub> were also  
330 integrated and adjusted with the connectivity constants  $K_{P,TRN1}^n$  and  $K_{P,TRN2}^n$ , respectively. Likewise,  
331 projections from TC to GABAergic interneurons in NMM “*n*”, namely BCs, SSTs and VIPs, were  
332 included through the connectivity constants  $K_{Th,BC}^n$ ,  $K_{Th,SST}^n$  and  $K_{Th,VIP}^n$ , respectively. The set of  
333 ODEs modeling the thalamo-cortical connections is described in Supplementary section 1.3  
334 (equations (13)-(19)). It is noteworthy that time-delays between the thalamus and the cortical NMMs  
335 were included as in the cortico-cortical long-range connections.

### 336 **3.5 Implementation and parameter tuning**

337 An important step in NMM approaches consists in tuning the model parameters. Some of these  
338 parameters, namely time constants in the three modules, were set close to the “standard values” used  
339 in neuronal population models, while other parameters such as connectivity constants were adjusted  
340 according to the target EEG activities. Two classical well-known examples of conscious and  
341 unconscious states are deep sleep- a.k.a. slow wave sleep (SWS) characterized by delta oscillations  
342 (0-4 Hz), and wakefulness (background activity). The objective was to reproduce these  
343 manifestations of consciousness modulation in the model.



344 In Supplementary Table 1, we provide physiological interpretation and values of model parameters.  
345 Regarding the model output, the signal simulated at the level of PCs in the cortical compartment was  
346 chosen as the model output since it corresponds to the sum of PSPs, which is the main contribution to  
347 LFPs recorded in the neocortex.

348 When several cortical NMMs are interconnected, a simple way to handle large-scale connectivity is  
349 to arrange the connectivity constants in arrays where line and column indices refer to source and  
350 target NMMs, respectively. Based on section 3.4, there are two categories of connectivity array,  
351 “excitatory to excitatory” and “excitatory to inhibitory” arrays. In the first category, we consider the  
352 matrix  $\mathbf{K}_{EXC}$  whose  $(i, j)^{\text{th}}$  element represents the glutamatergic projections from NMM “ $i$ ” onto an  
353 excitatory subpopulation in NMM “ $j$ ”. Hence, if both of them belongs to the cortical module, the  $(i,$   
354  $j)^{\text{th}}$  element would correspond to  $K_{P,P}^{i,j}$ . However, if NMM “ $i$ ” coincides with a thalamic population,  
355 the  $(i, j)^{\text{th}}$  element would be then equal to  $K_{Th,P}^j$ . In the second category, a similar scheme is  
356 considered with the difference that the target subpopulation is always an inhibitory interneuron (BC,  
357 SST, VIP or TRNs). Consequently, five arrays are considered, namely,  $\mathbf{K}_{BC}$ ,  $\mathbf{K}_{SST}$ ,  $\mathbf{K}_{VIP}$ ,  $\mathbf{K}_{TRN_1}$  and  
358  $\mathbf{K}_{TRN_2}$  (see Supplementary Figure 1). Note that when only one thalamic NMM is considered, the  
359 two last matrices are reduced to vector arrays. Cortico- and thalamo-cortical time-delays were  
360 similarly arranged in matrix  $\mathbf{D}$  whose  $(i, j)^{\text{th}}$  element coincides with the aforementioned  $D^{i,j}$ .

361 The set of second order stochastic nonlinear ODEs obtained for all synaptic interactions present in  
362 the model was numerically solved using a fixed step ( $\Delta t = 1$  ms) 4<sup>th</sup>-order Runge-Kutta method. The  
363 model was implemented using an object-oriented language (Objective-C).

364 To study the model behaviour, we followed a two-step approach. We first implemented a “toy  
365 model” with small number of coupled neural masses. This reduced-complexity model allowed to  
366 assess the effects of cortico- and thalamo-cortical connectivity matrices on cortical activities  
367 associated with different consciousness states (see sections 3.2, 3.3 and 3.4). After validation in the  
368 toy model, all mechanisms were implemented in an extended, more realistic model, where the whole  
369 brain was considered.

### 370 **3.5.1 Toy model of cortical activity**

371 The toy model was composed of one thalamic population connected to four cortical populations ( $N =$   
372  $4$ ) that were identically tuned. The default values of NMMs intrinsic parameters are listed in  
373 Supplementary Table 1. Unless explicitly mentioned, these parameters were kept unchanged for all  
374 neural activities generated afterwards (SWS and background activity). The objective was to verify, in  
375 a simplified model, the hypothesis that cortical activity is modulated from deep sleep to wakefulness  
376 by tuning only thalamo- and cortico-cortical connectivity, so that, when thalamocortical connectivity  
377 increases, the model goes deeper into sleep. This connectivity mechanism was implemented in all  
378 connectivity matrices in the model (see Supplementary Figure 2).

### 379 **3.5.2 Whole brain model: from cortical activity to EEG**

380 The pipeline used for the simulation of scalp EEG data is described in Figure 3. In order to obtain a  
381 “realistic” activity during wakefulness and SWS over the entire neocortex, we considered one  
382 thalamic population and 66 cortical populations ( $N+1 = 67$ ). Each time-course at the output of these  
383 populations represented the activity of one macro-region of the anatomical parcellation described in  
384 (Desikan, Segonne et al. 2006), in which the activity was assumed to be homogenous. In order to

385 generate 67 time-courses from the coupled NMMs (66 cortical regions plus the thalamus), we used a  
386 combination of connectivity arrays (Figure 3B). First, a matrix of connection weights  
387  $\mathbf{K}_{DTI}$  representing a density of fibers between all pairs of 66 cortical regions was used to set the  
388 structural connectivity. This matrix, obtained from DTI, is provided in (Hagmann, Cammoun et al.  
389 2008). Second, we considered additional functional horizontal (i.e. cortico-cortical) matrices  $\mathbf{K}_{Hx}$ ,  
390 reproducing the coefficients weights used for both wakefulness and sleep in the toy model, taking  
391 also into account the new number of populations. In order to apply the connectivity weights defined  
392 earlier in the toy model only to pairs of NMMs that are structurally connected. Structural and  
393 horizontal functional matrices were combined using the Hadamard product. Finally the vertical (i.e.  
394 thalamo-cortical) connectivity  $\mathbf{K}_{Vx}$  was added to this product to obtain a set of anatomo-functional  
395 connectivity matrices  $\mathcal{K}_x$  such that

$$\mathcal{K}_x = \mathbf{K}_{DTI} \odot \mathbf{K}_{Hx} + \mathbf{K}_{Vx}$$

396 with  $x = \{EXC, SST, BC, VIP, TRN1, TRN2\}$ . All connectivity matrices are described in  
397 Supplementary Figure 3.

398 Using this combination of connectivity weights, and specific parameters defined in Supplementary  
399 Material for delta and background activity, we built a spatio-temporal source matrix  $\mathbf{S}$  containing the  
400 time-varying activities of the thalamus and of all cortical macro-regions.

401 To reconstruct simulated scalp EEG data, we first solved the forward problem using the Boundary  
402 Element Method (BEM, OpenMEEG, (Gramfort, Papadopoulos et al. 2010). To this end, a realistic  
403 head model was built in Brainstorm (Tadel, Baillet et al. 2011) from the segmentation of a template  
404 T1 MRI (Colin 27 template brain, (Holmes, Hoge et al. 1998)) previously obtained using the  
405 Freesurfer image analysis suite (<http://surfer.nmr.mgh.harvard.edu/>, (Dale, Fischl et al. 1999, Fischl,  
406 Sereno et al. 1999)), as illustrated in Figure 3A. The head model consisted in three nested  
407 homogeneous mesh surfaces shaping the cortical surface (642 vertices), the skull (642 vertices) and  
408 the scalp (1082 vertices) with conductivity values of  $0.33 \text{ Sm}^{-1}$ ,  $0.0082 \text{ Sm}^{-1}$  and  $0.33 \text{ Sm}^{-1}$ ,  
409 respectively (Goncalves, de Munck et al. 2003). The forward problem was then numerically  
410 calculated for each vertex of the source mesh obtained from the segmented white matter/ grey matter  
411 interface of the same template brain. As a result, the leadfield matrix  $\mathbf{A}$  represented the contribution  
412 of each dipole of the source mesh at the level of 257 scalp electrode positions (high density EEG),  
413 placed over the scalp according to the geodesic convention (EGI®, Eugene, USA). All leadfield  
414 vectors of  $\mathbf{A}$  belonging to a common region of Desikan Atlas were added to obtain a simplified  $66 \times$   
415  $257$  matrix  $\mathbf{G}$ . The spatio-temporal matrix  $\mathbf{X}$  of simulated EEG data was given by the matrix product:

$$\mathbf{X} = \mathbf{G}\mathbf{S}$$

417 The entire pipeline enabling the simulation of scalp EEG is provided in Figure 3. Finally, as detailed  
418 in the Supplementary Material, a total number of 1060 ODE's must be solved to run the model. To  
419 give an idea of the required computing time, 60 seconds of simulated EEG could be simulated in 49  
420 seconds on a 3.5 GHz 6-Core Intel Xeon EG with 64GB of 1866 MHz RAM (OsX Mojave) and in 72  
421 seconds on a standard Intel 2.5 GHz 2-Core Xeon EG with 8GB RAM (Windows 10). Therefore, the  
422 model performed almost real-time simulation on a standard PC.

### 423 **3.6 Cortical response to TMS and PCI**

424 In order to simulate TMS-evoked EEG responses that can be compared to those recorded  
425 experimentally (Casali, Gosseries et al. 2013), we included the effect of an exogenous, TMS-induced,

426 stimulation in the whole-brain model. The model can simulate not only the activity of the 67 pre-  
427 defined anatomical regions, but also the EEG signals recorded by 257 scalp electrodes. Furthermore,  
428 since the model includes, as a connectivity matrix between the 67 regions, a DTI-derived  
429 connectivity matrix (Hagmann, Cammoun et al. 2008), it is possible to track the spatio-temporal  
430 dynamics of the stimulation-evoked network, i.e. the activated regions, along with the peak latency  
431 for each region. In addition, since the model can simulate “wake” and “sleep” states, it provides the  
432 opportunity to compare TMS-evoked responses in these two states of consciousness, which have  
433 been experimentally recorded in humans. Therefore, the structure of our computational model  
434 provides a unique framework to interpret TMS-evoked EEG responses obtained in humans.

435 In principle, TMS involves a high-intensity current flowing through the stimulation coil, thereby  
436 generating a magnetic field penetrating without attenuation through the head. Since the stimulation  
437 pulse is very short ( $\approx 0.1$  ms), the magnetic field gradient  $dB/dt$  is extremely high ( $> 30,000$  T/s),  
438 resulting per Maxwell-Ampere’s law into an electric field at the level of brain tissue. Since the  
439 electric field induced in brain tissue is high ( $> 100$  V/m, (Miranda, Hallett et al. 2003)), this induces  
440 neuronal firing, presumably at the bending point of cortical axons, triggering a series of complex  
441 activations within the stimulated area (Di Lazzaro and Ziemann 2013).

442 We used a simple approach to represent the effect of TMS, consisting in simulating an afferent volley  
443 of action potentials (in terms of pulses/s) to the stimulated cortical region. Since the 1 ms time step  
444 used to numerically solve the equations of the model was higher than the duration of an actual TMS  
445 pulse, the simulated length of this volley of incoming action potential was adapted and fixed to 5 ms.  
446 The amplitude of the simulated evoked volley of action potentials was fixed to 1000 pulses/s, and  
447 was applied to each cellular subtype of the stimulated region (i.e., PCs and all types of GABAergic  
448 interneurons). For the purpose of this paper, we chose to simulate the stimulation of the right cuneus  
449 in both conditions (“wake” and “sleep”), which is known to have a number of anatomical  
450 connections that should result in the propagation of the TMS-evoked responses in several cortical  
451 structures. The repetition rate of the TMS protocol was fixed to 2 seconds, and the total simulation  
452 duration was a full minute, resulting in a total of 30 TMS-evoked responses available at the source  
453 level. The EEG activity at the level of each scalp electrode was then computed from the simulated  
454 source activity using our EEG forward problem pipeline, as described previously. From the simulated  
455 TMS-evoked responses, the studied outcomes were the anatomical regions activated by TMS, and  
456 also their latency from the onset of the TMS pulse.

457 Finally, simulated EEG responses were used to compute the Perturbational Complexity Index (PCI)  
458 (Casali, Gosseries et al. 2013). PCI is a measure of TMS-evoked responses complexity, based on the  
459 Lampel-Ziv compression algorithm. The basic idea is that, if a sequence of information is complex,  
460 then it can be only marginally compressed (low compression rate); and on the opposite a very simple  
461 sequence can be described by a very limited amount of information (high compression rate). To  
462 derive PCI, a process similar to the one proposed by Casali et al. was used (Casali, Gosseries et al.  
463 2013):

- 464 - The sources activity is stored in a 2D matrix (number of lines equal to the number of channels,  
465 number of columns equal to the number of time points).
- 466 - A threshold value for the simulated sources activity was set by preserving the highest 20%  
467 (proportional threshold) of values once fixing to 0 values below it.

468 - Each value of the sources activity matrix that is above or equal to the threshold value is set to 1,  
469 while all other values are set to 0 (binarization process).

470 - The Lempel-Ziv algorithm is then applied to the resulting binary matrix.

471 PCI values were computed in the two different scenarios, corresponding to the “wake” and “sleep”  
472 state, respectively.

473 Overall, our implementation of TMS-evoked responses enables a meaningful comparison with  
474 human data, since it results in similar experimentally measurable quantities: impacted anatomical  
475 regions, latency of the TMS-evoked response within specific regions, and complexity of the brain-  
476 scale response through PCI.

## 477 **4 Results**

### 478 **4.1 Toy model: the impact of cortico- and thalamo-cortical connectivity on the cortical** 479 **rhythms during sleep and wakefulness**

480 During the deep sleep state, the thalamocortical connectivity is meant to be strong compared to the  
481 cortico-cortical one (see Supplementary Figure 2, first column). Our strategy consisted in  
482 progressively and simultaneously decreasing and increasing the thalamo- and cortico-cortical  
483 connectivity, respectively, in order to switch to wakefulness (see Supplementary Figure 2, column 2).  
484 Note that this connectivity process was mostly reflected by arrays  $K_{EXC}$  and  $K_{BC}$ , to simulate the  
485 strong thalamic projections onto PCs and BCs as reported in section 0. It is also noteworthy that no  
486 time delays were injected in the toy model example.

487 In Figure 4, we provide an example of simulated LFPs a.k.a. intracerebral EEG (iEEG) in  
488 comparison with real (human) ones. The left column depicts the scheme of high (and low) thalamo-  
489 (and cortico-) cortical connectivity. As depicted, the reinforcement of the thalamocortical loop  
490 (TC→PC→TRNs and TC→BC) resulted in the generation of delta oscillations that characterize  
491 SWS. In this example, the simulated delta was around 2-3 Hz (slightly faster than real iEEG).  
492 Conversely, by reducing the thalamocortical loop (right column), delta waves disappeared and were  
493 replaced by background activity, indicative of oscillatory changes observed during the switch from  
494 sleep to wake. We emphasize that only the large scale connectivity was tuned while all remaining  
495 parameters were kept unchanged, confirming the crucial role of thalamo- and cortico-cortical  
496 connectivity in modulating consciousness.

### 497 **4.2 Whole brain model: the impact of cortico- and thalamo-cortical connectivity on scalp** 498 **EEG rhythms during sleep and wakefulness**

499 The morphology of simulated intracerebral signals was not modified when connectivity matrices  
500 were adapted to a larger number of NMMs in order to account for whole-brain activity. In the case of  
501 low thalamo-cortical connectivity (wakefulness condition), background activity was similar to  
502 signals obtained in the toy model and resembled real intracerebral background activity recorded  
503 during wakefulness in humans. Similarly, by increasing thalamo-cortical connectivity, the whole-  
504 brain model generated delta activity at a mean frequency of 3.8 Hz that was consistent with the  
505 morphology and spectral content of delta activity obtained both from the toy model and from real  
506 intracerebral recordings during SWS.

507 Signals obtained with the whole-brain model in both conditions of wakefulness and SWS were used  
508 in the forward calculation to generate simulated scalp EEG data at the level of 257 electrodes (Figure  
509 5). In the low-thalamocortical connectivity condition, simulated scalp EEG (Figure 5A) resembled  
510 scalp EEG background activity as recorded in humans during wakefulness (Figure 5C). The spectral  
511 analysis disclosed similar sub-band distribution in the simulated *vs.* real case, although simulated  
512 signals contained more beta frequency than real background activity. In the high-thalamo-cortical  
513 connectivity condition, simulated scalp EEG (Figure 5B) was comparable to scalp EEG signals  
514 recorded in humans during SWS (Figure 5D). In the simulation case, the peak frequency was 3.8 Hz,  
515 thus slightly higher than in the real case (2 Hz). Topographical voltage maps at the peak of delta  
516 waves showed analogous distribution over the vertex, the activity in the simulated case being slightly  
517 more posterior than on the real case example.

### 518 **4.3 Bridging brain circuits, TMS-evoked EEG responses and complexity metrics**

519 In Figure 6, we describe the process used to estimate the complexity of TMS-evoked EEG responses  
520 within our brain-scale model and in humans (Casali, Gosseries et al. 2013). As depicted, the  
521 simulated TMS-evoked EEG response (Figure 6B) was very similar to the human response (Figure  
522 6A), not only in terms of length (250 and 350 ms, respectively) but also in term of regions distant  
523 from the right motor cortex (the stimulated area) that are activated post-stimulation. Indeed, in the  
524 simulated and experimental data, a first activation of the right pre-central gyrus occurred within 15  
525 ms from the TMS pulse, followed by activity evoked notably in the right precuneus within 40 ms and  
526 a common propagation in the contralateral left precuneus at about 60 ms from the stimulus. In both  
527 simulated and experimental TMS-evoked responses, activity was evoked in the right frontal lobe  
528 within 110-120 ms, with activation of the right superior parietal cortex within 175 ms (human data)  
529 and 150 ms (model data). The most important difference is that the human TMS-evoked response  
530 was notably longer as compared to the model.

531 We then compared the simulated and experimental TMS-evoked responses in wakefulness and in  
532 sleep, along with their PCI value, which is presented in Figure 7. In the two cases, the right motor  
533 area is stimulated. In the case of wakefulness, as also illustrated in Figure 6, there was a satisfactory  
534 agreement in the duration and global shape of the response, and also in terms of the sequence of  
535 activated brain regions. More precisely, by comparing Figure 7A (upper) and B (upper), we can  
536 conclude that the tracking of the propagation of the TMS-evoked activity revealed that this  
537 propagation occurred, as expected, along documented inter-regional connections from the DTI-  
538 derived connectivity matrix used in the model. PCI values obtained were also extremely similar (0.52  
539 and 0.51 for the model and for humans, respectively). Conversely, in the “Sleep” condition, the time  
540 course of the TMS-evoked response was significantly shorter (less than 200 ms), which is also  
541 comparable to TMS-EEG human recordings. In addition, another striking similarity with human data  
542 is that the TMS-evoked activity remained confined to the stimulated area, i.e. the right motor area.  
543 The PCI value in this condition was 0.19, which is very similar to the value obtained in humans  
544 during sleep (0.23, see Figure 7A, lower panel), notably lower than the “Wakefulness” condition,  
545 which is also consistent with human data (Casali, Gosseries et al. 2013). Therefore, despite using the  
546 exact same TMS pulse characteristics within the two conditions (“Wakefulness” and “Sleep”), the  
547 simulated response was drastically different within the model: in wakefulness, the TMS-evoked  
548 response resulted in a complex sequence of successive activations within distant, anatomically  
549 connected areas in ipsilateral and contralateral regions; while during sleep the TMS-evoked activity  
550 remained confined to the stimulation site, even when the anatomical connections were present as in  
551 the “sleep” condition.

## 552 **5 Discussion and perspective**

553 In this paper, we have developed the first brain-scale computational model that can reproduce  
554 neuronal activity patterns associated with various conscious states, while accounting for key  
555 microcircuits at the cellular type scale. A major asset of the model is its strong link with recent  
556 neurophysiological and neuroanatomical data: the main cellular types are included (PCs and different  
557 types of interneurons), along with their recently elucidated connections that underlie the selective  
558 disinhibition of distant neural populations (through VIP to SST projections), realistic synaptic  
559 kinetics, large-scale structural connectivity obtained in humans through DTI and propagation delays  
560 between regions based on their spatial distance. Furthermore, since the model features detailed  
561 micro-circuits, DTI-derived brain connectivity matrix and large-scale macro-circuits results also  
562 provided a bottom-up description of TMS-evoked responses in human.

563 The model offers novel, key insights into the maintenance of the neuronal activity associated with  
564 conscious states. Interestingly, this model including a variety of cellular subtypes with accurate  
565 synaptic kinetics provides realistic electrophysiological signals both at the level of cortical sources  
566 and of the EEG. First, it explains how thalamo-cortical (vertical) connectivity is critically involved in  
567 the gating of cortico-cortical (horizontal) information propagation. If thalamo-cortical activity is  
568 indeed rhythmically patterned, the communication between cortical areas is disrupted due to the  
569 resulting rhythmic inhibition. This result is therefore in line with the “connectivity breakdown”  
570 observed during sleep (Esser, Hill et al. 2009, Ferrarelli, Massimini et al. 2010, Casali, Gosseries et  
571 al. 2013).

572 Crucially, the various conscious states simulated with the model can be tuned by modulating only the  
573 thalamo-cortical input, which supports our hypothesis that this represents the crucial control  
574 parameter for consciousness, i.e. the dimension of wakefulness. It can be seen essentially as the  
575 possibility for information processing to take place between spatially distant cortical areas. Since the  
576 propagation of activity is impaired at the cortical level during sleep (absence of wakefulness), no  
577 cortical processing can take place, which explains the absence of consciousness. Second, regarding  
578 cortico-cortical activity (horizontal connectivity), since the model reproduces with a satisfactory  
579 qualitative and quantitative agreement the TMS-evoked EEG responses observed in awake humans  
580 (Casali, Gosseries et al. 2013), this suggests that 1) our modeling hypotheses and choices appear  
581 sufficient to capture the essence of TMS-EEG responses; 2) TMS-EEG responses are mainly driven  
582 by the underlying structural connectome, which is in line with recent research pointing at the tight  
583 links between structural and functional connectivity (Avena-Koenigsberger, Misic et al. 2017); 3)  
584 this modeling approach could be used to assist in the interpretation of TMS-evoked EEG responses in  
585 DOC patients, since our model links explicitly the underlying connectivity with the observed TMS-  
586 evoked response. Finally, the model validates that, at the brain scale, the disinhibitory disinhibition of  
587 distant pyramidal cells through the activation of VIP neurons is indeed an effective mechanism  
588 enabling the transmission of activity between a few cortical regions. The model therefore confirms  
589 the role of a cellular-scale micro-circuit that regulates brain-scale propagation of activity within the  
590 cortex.

591 Among the possibilities to improve the realism and predictive power of our brain-scale model, the  
592 most immediate would be the use of structural connectivity matrices averaged among a large number  
593 of healthy participants, such as those from the Human Connectome Project (see the link  
594 <http://www.humanconnectomeproject.org>). Furthermore, no regional specificities were accounted for  
595 between the 66 cortical regions included within the model, since we used standard parameter values  
596 for the synaptic gains (e.g., A, B and G) and the same within-population connectivity parameters. By

597 doing so, we have assumed that the large-scale anatomic structure of brain connectivity and the  
598 cellular-scale micro-circuits included are the main factors explaining the resulting simulated EEG  
599 signals.

600 It should be mentioned that in the case of deep sleep simulated signals, the median frequency of delta  
601 activity was higher in the model (2-3 Hz) as compared to human data (~1 Hz). This discrepancy is  
602 explained by the fact that model does not implement the mechanisms underlying slow oscillations  
603 (~1 Hz) generated in cortical and thalamic networks, among which: i) the sequence of depolarizing  
604 periods followed by silent periods (up to 2 s) during up-and-down states as well as ii) GABA<sub>B</sub>-  
605 mediated pre-synaptic slow inhibition that also appears to play some role (see review in (Neske  
606 2015)). Other limitations likely explain the moderate discrepancies between the simulated and  
607 experimental TMS-EEG responses in terms of latencies and localizations, such as the lack of  
608 asymmetry in connectivity weights (i.e., all connections were assumed bidirectional and identical).

609 The future prospects regarding our brain-scale EEG model are numerous: in terms of consciousness  
610 studies, the model could be used to study the mechanisms underlying the so-called “slow-wave  
611 activity saturation”, delta-band activity that appears when the blood concentration of anesthetics is  
612 increased (Ni Mhuirheartaigh, Warnaby et al. 2013), and that constitutes a solid marker of the  
613 conscious state. Furthermore, this study improves our understanding of active probing paradigms of  
614 brain circuits in DOCs, such as the PCI and paves the way toward the design of optimized  
615 stimulation-based metrics to measure consciousness. The model indeed allows to test *in silico* novel  
616 neuromodulation protocols based on TMS, transcranial direct current stimulation (tDCS) and  
617 transcranial alternating current stimulation (tACS), aiming at quantifying the level of residual  
618 consciousness in DOC patients. Beyond applications for consciousness, the model could be exploited  
619 to understand the detailed dynamics of TMS-EEG responses and their underlying mechanisms, or to  
620 shed light on the mechanisms underlying the generation and propagation of epileptiform activity.

## 621 **6 Conflict of Interest**

622 The authors declare that the research was conducted in the absence of any commercial or financial  
623 relationships that could be construed as a potential conflict of interest.

## 624 **7 Author Contributions**

625 SB: model implementation, simulations, data analysis, manuscript write-up. JM: model design,  
626 simulations, data analysis, manuscript write-up. IM: simulations, data analysis, manuscript write-up.  
627 FW: model design, data analysis, manuscript write-up. PB: model design, data analysis, manuscript  
628 write-up.

## 629 **8 Funding**

630 This work has been fully funded by the LUMINOUS Project. This project has received funding from  
631 the European Union's Horizon 2020 research and innovation program H2020-FETOPEN-2014-2015-  
632 RIA under agreement No. 686764.

633

634

635



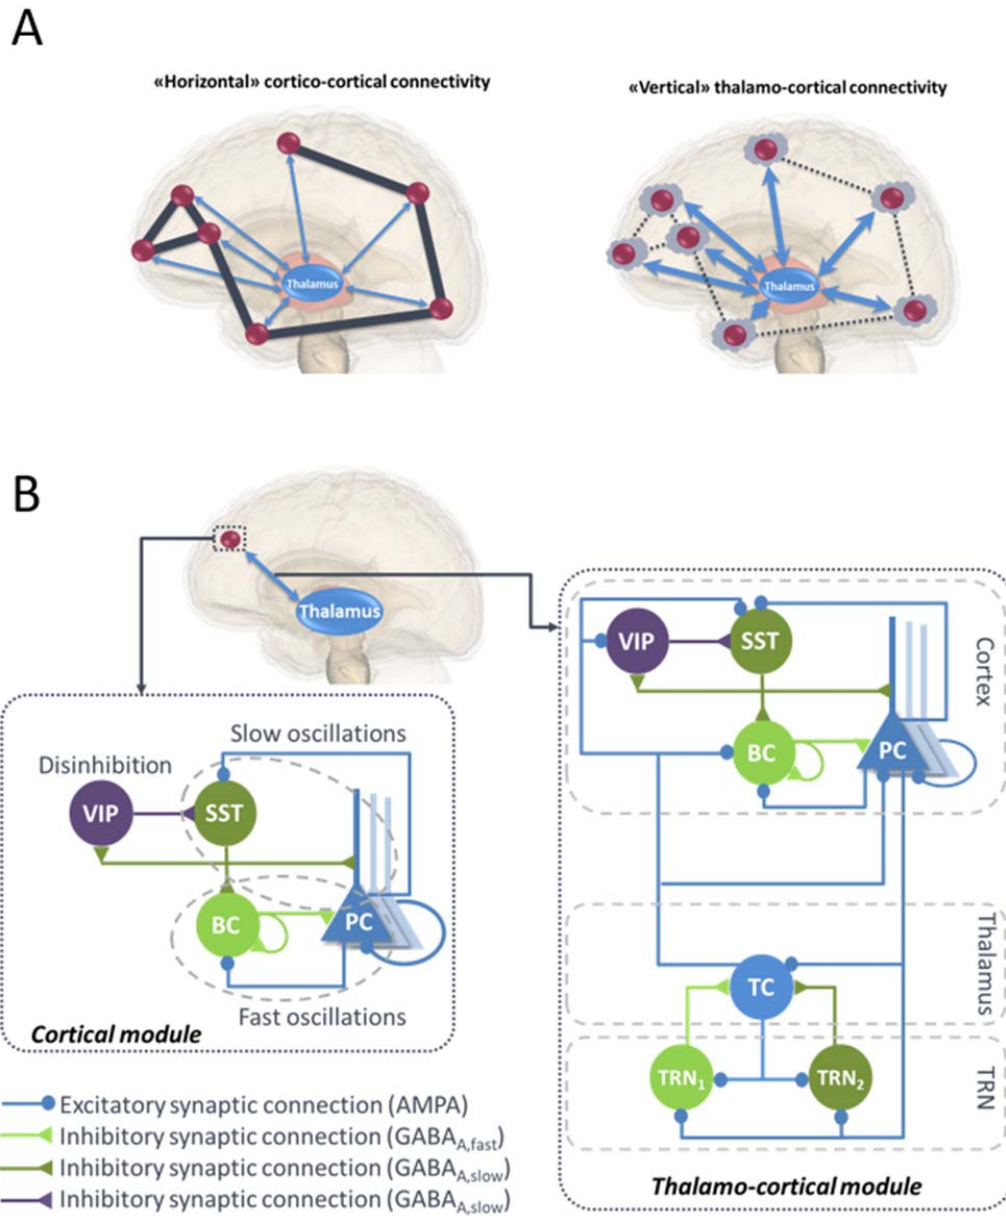

636

637 **Figure 1. (A) Illustration of “horizontal” and “vertical” connectivity. Left:** Horizontal  
 638 connectivity refers to the cortico-cortical connections which are functionally effective during  
 639 wakefulness, with a weak level of thalamo-cortical coupling. **Right:** Vertical connectivity refers to  
 640 thalamo-cortical projections that functionally impair cortico-cortical connectivity during sleep. **(B)**  
 641 **General architecture of the micro- and macro-circuits implemented in the computational**  
 642 **model.** The local NMM of cortical activity is composed of a PC exciting two GABAergic  
 643 interneurons, namely, the somatic-projecting BC and the dendritic-projecting SST, responsible for  
 644 the generation of fast and slow oscillations, respectively; the VIP were introduced as they play a  
 645 crucial role in cortical column communication through disinhibition of SST. The subcortical module  
 646 consisted in TC sending excitatory glutamatergic projections to the TRN block composed of fast and  
 647 slow GABAergic interneurons TRN<sub>1</sub> and TRN<sub>2</sub>, respectively. **VIP:** vasoactive intestinal peptide  
 648 positive GABAergic interneurons. **SST:** Somatostatin-positive GABAergic interneurons. **BC:** Basket-  
 649 type GABAergic interneurons. **PC:** Glutamatergic Pyramidal Cells.

650

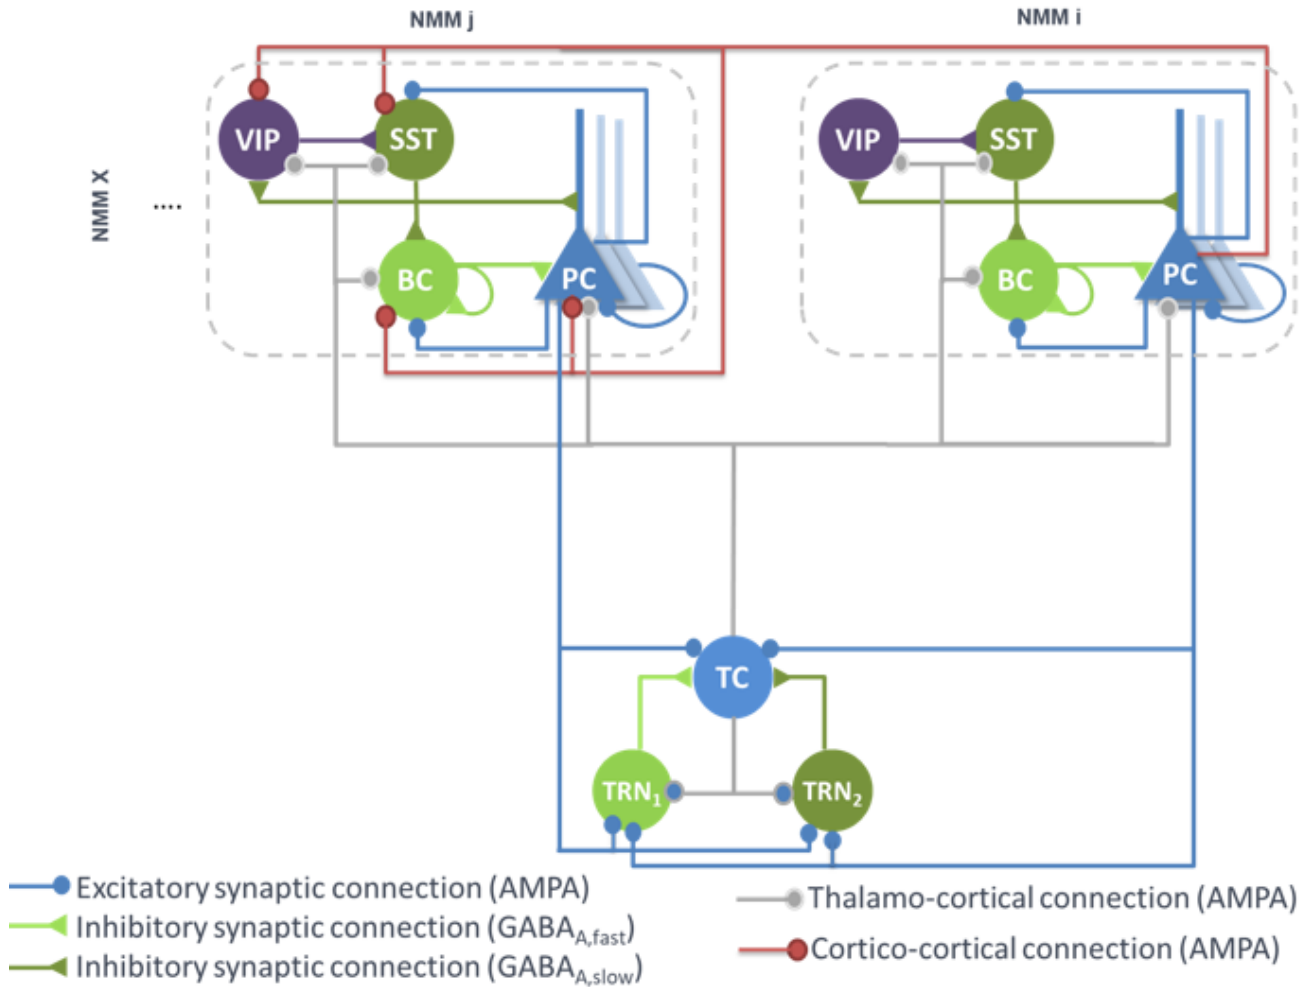

651  
652

653 **Figure 2. Large-scale architecture of the model.** Illustration of the synaptic projections between  
654 cortical modules, and between thalamic and cortical modules. Note the presence of long-range  
655 thalamocortical and cortico-cortical feedforward inhibition. For the sake of clarity, long-range  
656 connections between cortical NMM<sub>*i*</sub> and NMM<sub>*j*</sub> are unidirectional, whereas in the model, pyramidal  
657 cells of NMM<sub>*j*</sub> also project on neurons of NMM<sub>*i*</sub>. The strength of the synaptic input of PC onto distant  
658 VIP cells is larger than the input onto the other distant interneurons (SST, Basket).

659

660

661

662

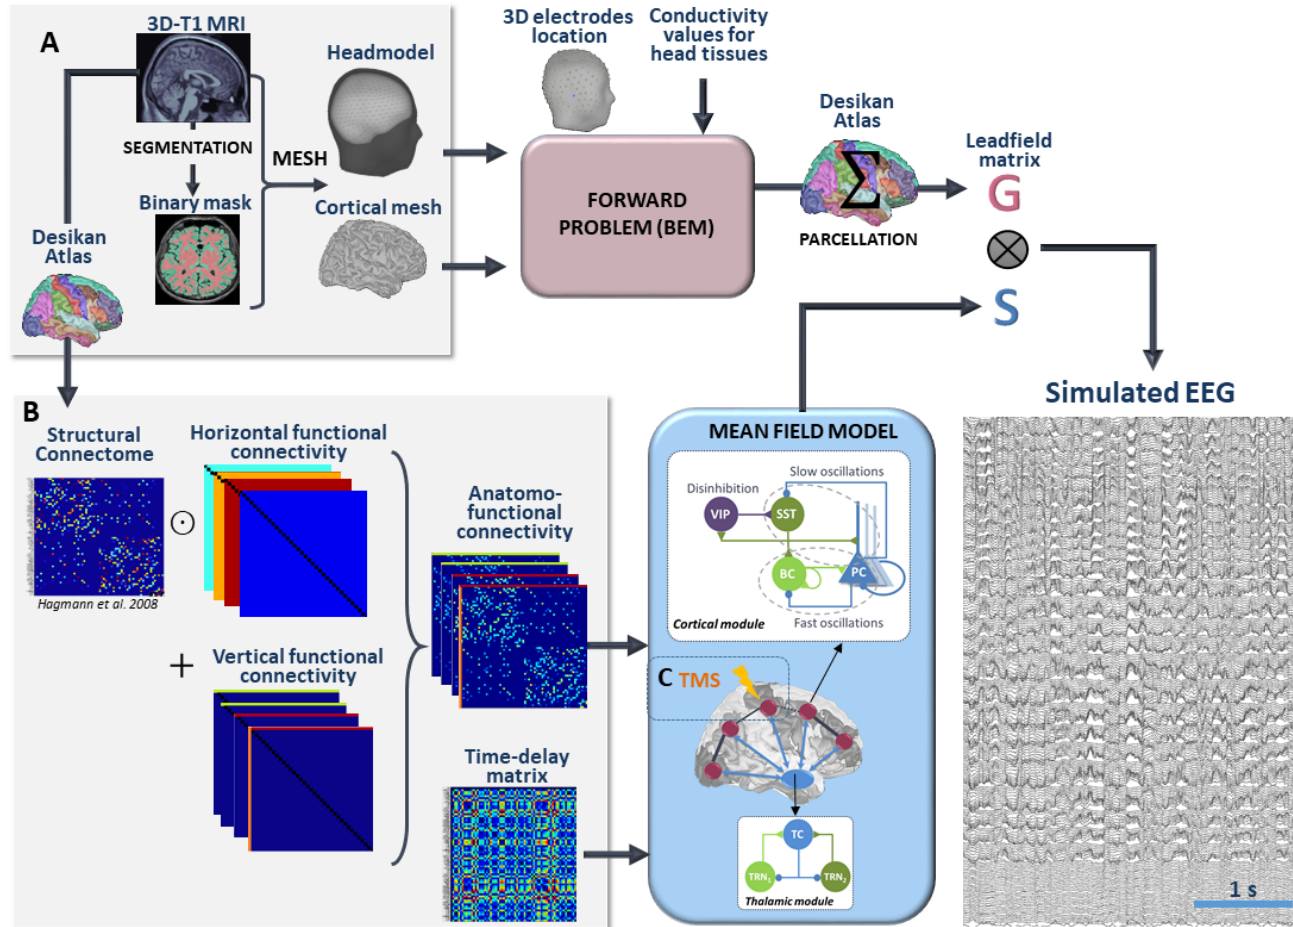

663

664 **Figure 3. Full processing pipeline leading to the simulation of scalp EEGs.** The pipeline to  
 665 simulate EEG is a two-step process. (A) First, the forward problem is solved at the level of 257 scalp  
 666 electrodes from a dipole layer constrained to the surface of a cortical mesh (15000 vertices) midway  
 667 between the Grey/White matter interface and the cortex surface. The boundary Element Method is  
 668 used for the calculation within a realistic head model that accounts for the conductivity properties and  
 669 the geometry of brain, skull and scalp. This step provides a 257x150000 leadfield matrix  $A$   
 670 representing the contribution of each individual cortical dipole at each of the 257 scalp electrodes.  
 671 In this matrix, leadfield vectors belonging to a common region of the Desikan Atlas are added to  
 672 obtain a simplified 66 x 257 matrix  $G$ . Second, the time courses  $S$  at the whole brain level are  
 673 obtained in the mean field model from a set of 66 cortical and one thalamic coupled NMMs. (B)  
 674 Coupling between these 67 NMMs is done using combination of connection weight matrices. Pairs  
 675 of structurally connected cortical NMMs are first defined from a matrix of connection weights  
 676 representing a density of fibers between all pairs of 66 cortical regions of the Desikan Atlas.  
 677 This matrix is provided in (Hagmann, Cammoun et al. 2008). Using an element-wise multiplication,  
 678 this matrix is combined with a set of horizontal (i.e. cortico-cortical) functional connectivity  
 679 matrices that reproduce the coefficients weights used for wakefulness and sleep in the toy model.  
 680 Vertical (i.e. thalamo-cortical) connectivity matrices are added to each of these products to  
 681 obtain connectivity weight matrices that account for anatomical connections as well as cortico-cortical  
 682 and thalamo-cortical connectivity matrices. Cortico- and thalamo-cortical time-delays were  
 683 similarly organized in the form of matrices where the elements represent the Cartesian distance  
 684 between cortical NMMs divided by the mean velocity of travelling for action potentials. (C) The  
 mean field model includes

685 explicitly the contribution of an external stimulus term that represents the effect of TMS. At the  
686 output of the pipeline, scalp EEG signals at the level of 257 channels are obtained as the product of  
687 leadfield  $G$  and source time courses  $S$ .

688

689

690

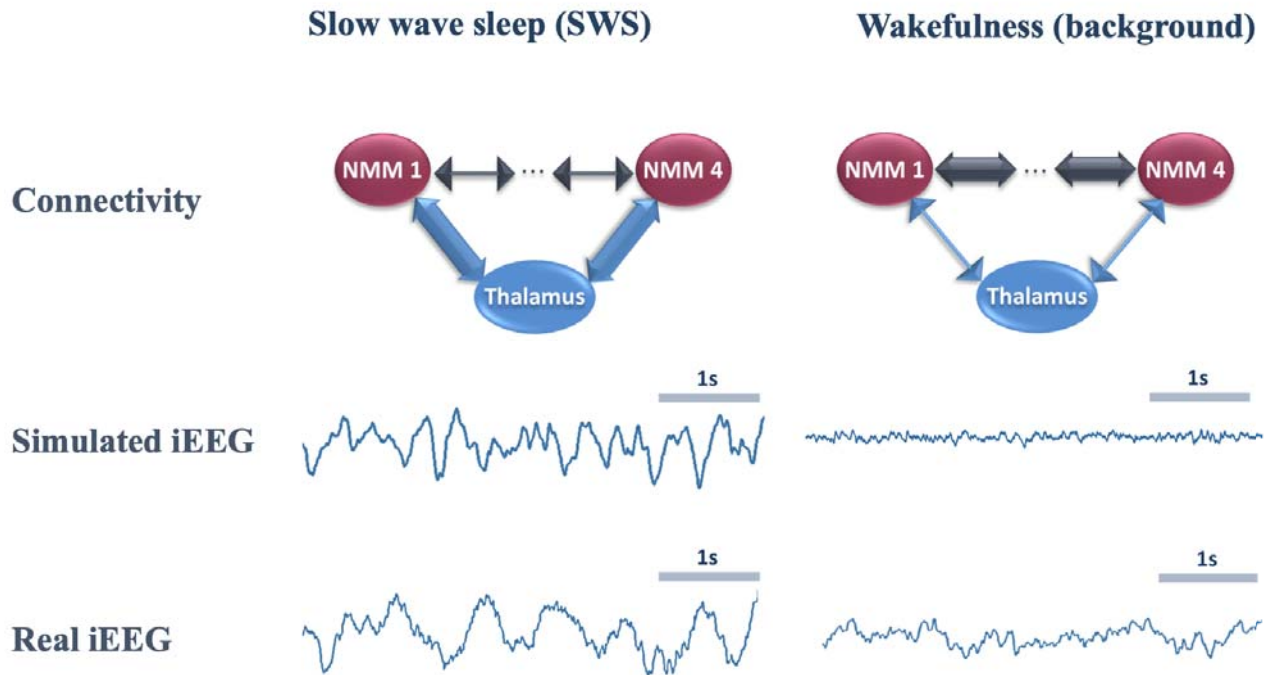

691

692

693

694 **Figure 4. Comparison of real and simulated intracerebral EEG (iEEG) (toy model,  $N = 4$ ).** *Left*  
695 *column:* In the condition of high thalamo-cortical connectivity (i.e. low cortico-cortical connectivity),  
696 signals generated by the mean field model are characterized by delta waves ( $\sim 4$  Hz). These  
697 simulated signals are similar (although slightly faster) to delta waves recorded by intracerebral EEG  
698 (iEEG) during SWS in non-epileptic cortical regions of one patient undergoing an invasive EEG  
699 exploration. *Right column:* In the condition of low thalamo-cortical connectivity, signals generated  
700 by the mean field model are similar to background activity recorded by iEEG in real conditions  
701 during wakefulness. Note that these iEEG recordings are performed in patients who are candidate to  
702 epilepsy surgery. For the sake of this study, only iEEG signals that do not show epileptic activity  
703 were retained.

704

705

706

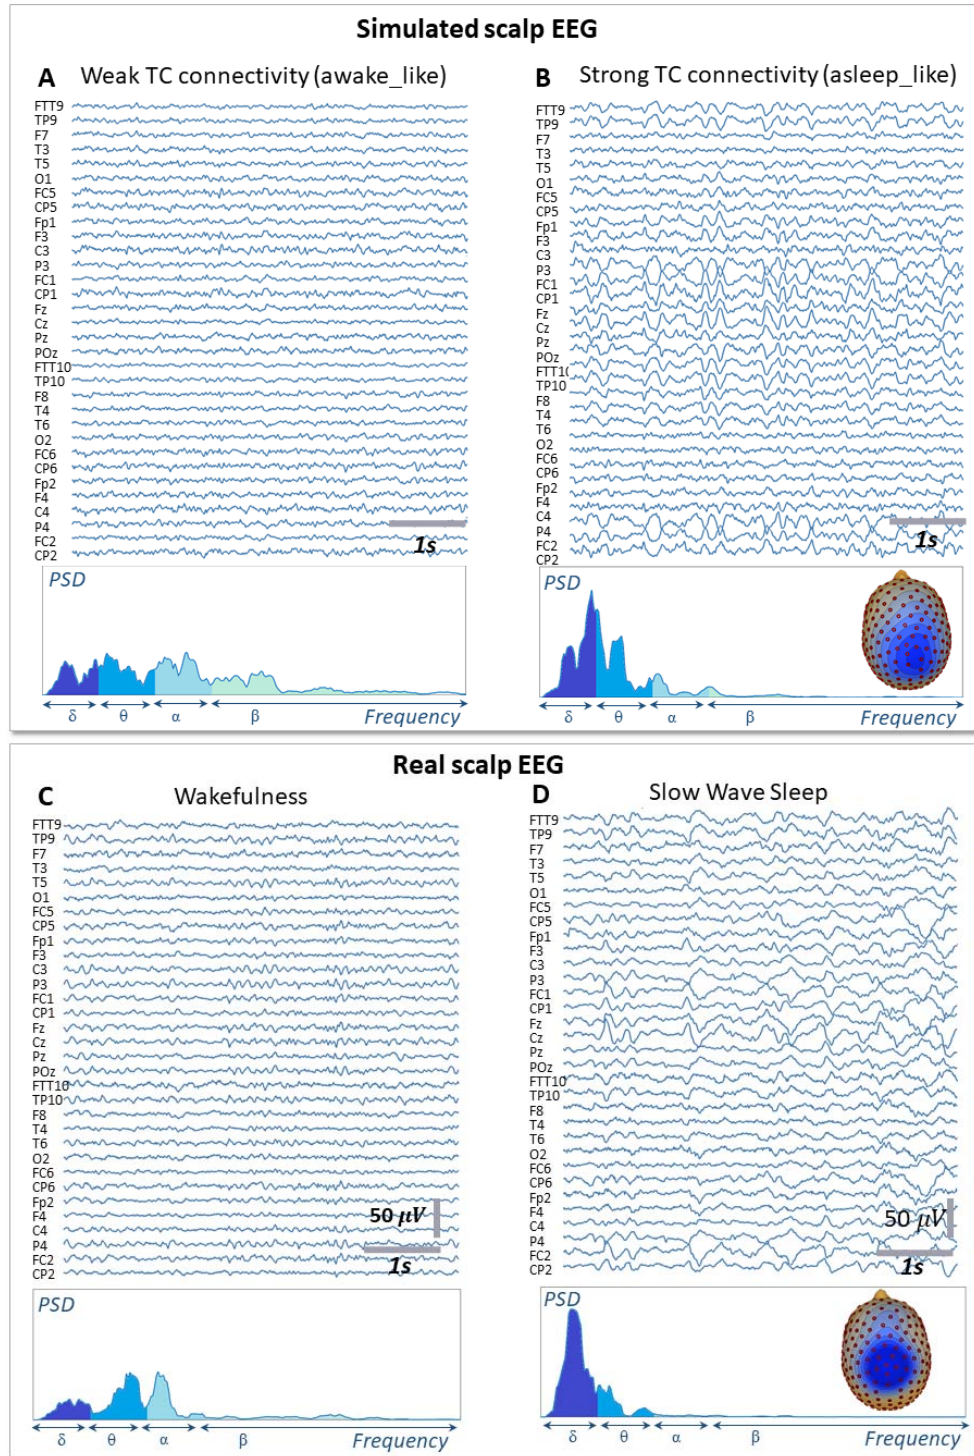

707

708 **Figure 5. Simulated vs. Real EEG during wakefulness and SWS.** Signals simulated with the  
 709 whole-brain model using weak thalamo-cortical connectivity parameters (A) display background  
 710 activity. The morphology and spectral content of these simulated signals is similar to scalp EEG  
 711 recorded in a human subject during wakefulness in humans (C), except for a higher power spectral  
 712 density in the beta sub-band. Signals simulated with the whole-brain model using strong thalamo-  
 713 cortical connectivity parameters (B) display delta waves similar to the activity recorded in real

714 condition during SWS in humans (**D**). The spectral content of signals as well as the topographical  
715 voltage distribution at the peak of delta waves were similar in the simulated and real conditions.

716

**A Real, wakefulness +TMS stimulation (modified from Casali et al, 2013)**

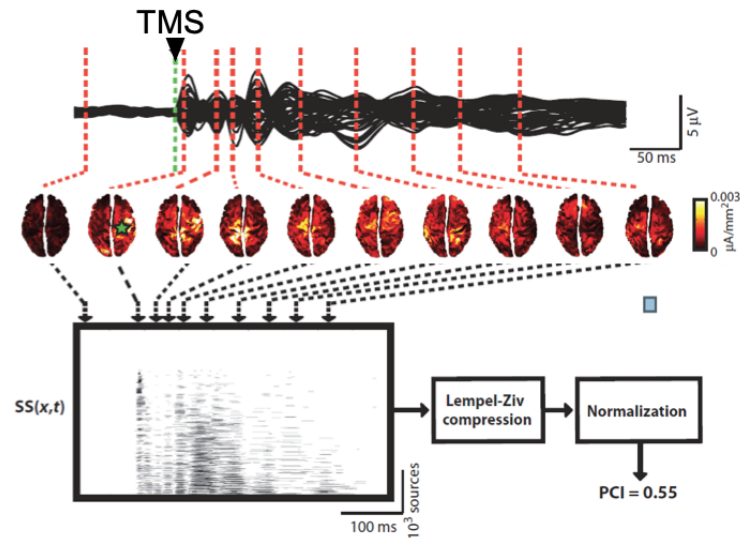

**B Virtual Brain, « wakefulness mode » + Simulated TMS**

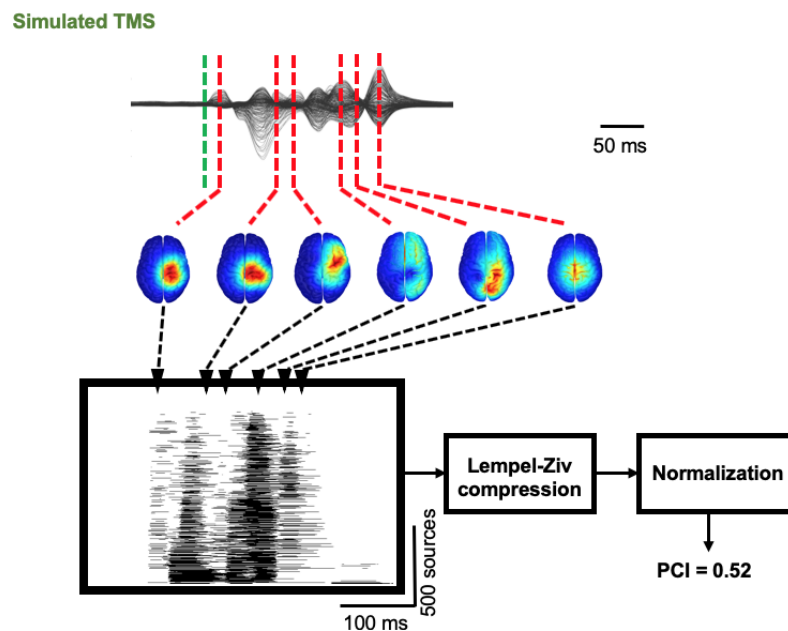

717

718 **Figure 6. Comparison of TMS-EEG evoked responses *in silico* and *in humans*.** (A) Time course  
719 of a human TMS-EEG response (modified from Casali et al., 2013) following stimulation of the  
720 motor cortex during wakefulness. Once that cortical sources have been computed from EEG  
721 recordings, a spatio-temporal matrix of significant sources was built and the Lempel-Ziv  
722 compression algorithm was used to compute the complexity of the evoked response (Perturbational  
723 Complexity Index, PCI). (B) Time course of a simulated TMS-EEG response using our brain-scale,  
724 following stimulation of the motor area in the wakefulness mode. Cortical sources were reconstructed  
725 from the simulated EEG, and a similar procedure was used to compute PCI. A similar PCI value was  
726 obtained in the simulated and experimental TMS-evoked EEG responses in the awake state.

727

728

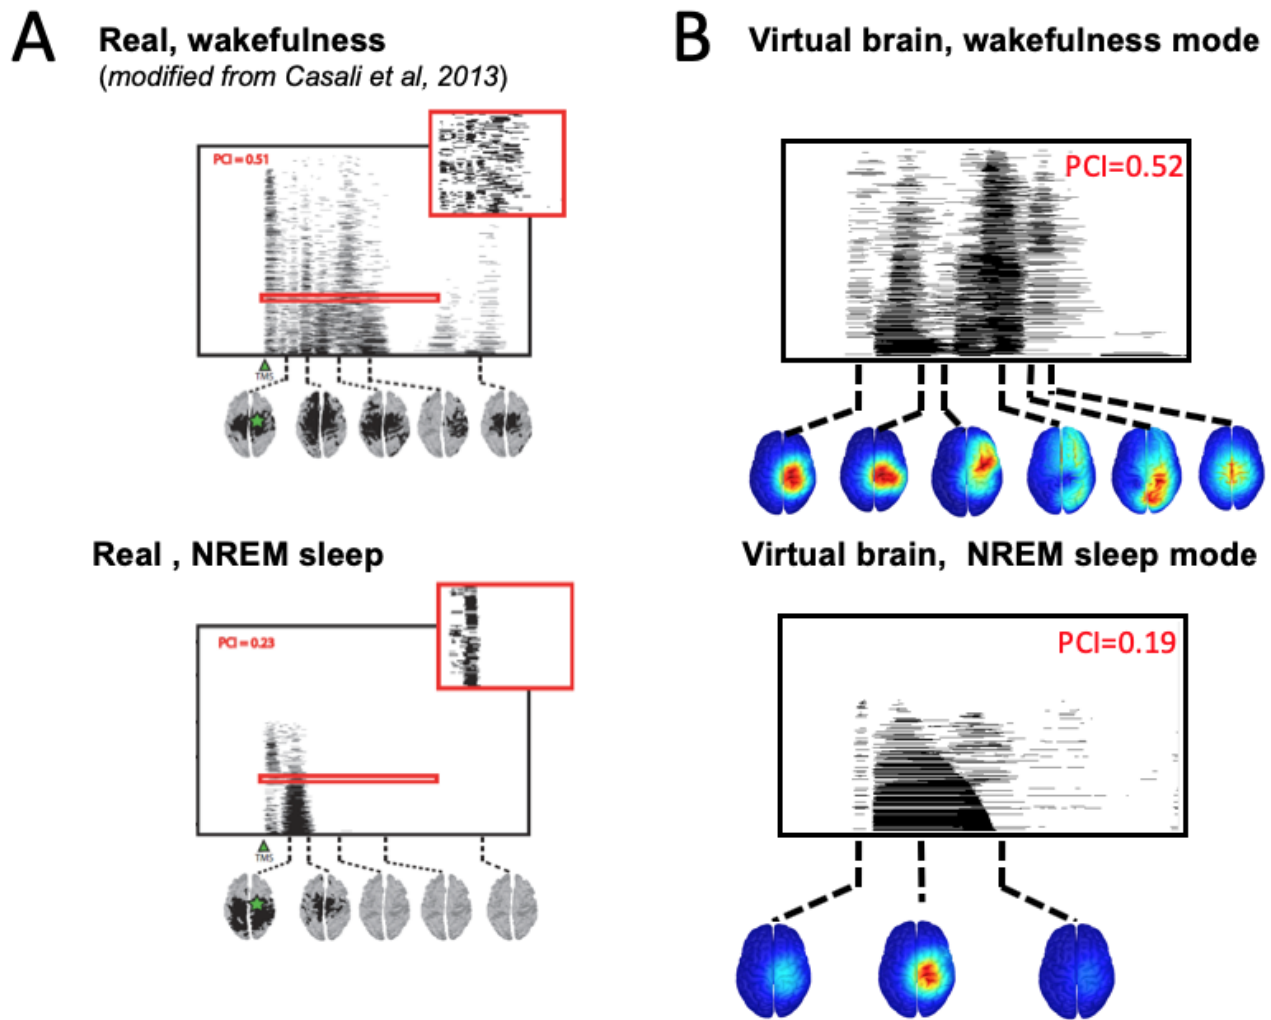

729

730 **Figure 7. Comparison of TMS-evoked EEG responses in wakefulness and sleep.** (A) TMS-  
731 evoked EEG responses obtained through TMS of the motor cortex in humans (upper panel, during  
732 wakefulness; lower panel, during sleep) with associated PCI values. (B) TMS-evoked EEG responses  
733 obtained through simulated TMS of the motor region (upper panel, in the wakefulness mode; lower  
734 panel, during the sleep mode) with associated PCI values.

735

736

737



738 **References**

- 739 Adesnik, H., W. Bruns, H. Taniguchi, Z. J. Huang and M. Scanziani (2012). "A neural circuit for  
740 spatial summation in visual cortex." Nature **490**: 226.
- 741 Avena-Koenigsberger, A., B. Misic and O. Sporns (2017). "Communication dynamics in complex  
742 brain networks." Nature Reviews Neuroscience **19**: 17.
- 743 Ayzenshtat, I., M. M. Karnani, J. Jackson and R. Yuste (2016). "Cortical Control of Spatial  
744 Resolution by VIP<sup>+</sup> Interneurons." The Journal of Neuroscience **36**(45): 11498-11509.
- 745 Bhattacharya, B. S., D. Coyle and L. P. Maguire (2011). "A thalamo-cortico-thalamic neural mass  
746 model to study alpha rhythms in Alzheimer's disease." Neural Networks **24**(6): 631-645.
- 747 Breakspear, M. (2017). "Dynamic models of large-scale brain activity." Nature Neuroscience **20**:  
748 340.
- 749 Buzsáki, G. and X.-J. Wang (2012). "Mechanisms of Gamma Oscillations." Annual Review of  
750 Neuroscience **35**(1): 203-225.
- 751 Casali, A. G., O. Gosseries, M. Rosanova, M. Boly, S. Sarasso, K. R. Casali, S. Casarotto, M. A.  
752 Bruno, S. Laureys, G. Tononi and M. Massimini (2013). "A theoretically based index of  
753 consciousness independent of sensory processing and behavior." Sci Transl Med **5**(198): 198ra105.
- 754 Chen, G., Y. Zhang, X. Li, X. Zhao, Q. Ye, Y. Lin, H. W. Tao, M. J. Rasch and X. Zhang (2017).  
755 "Distinct Inhibitory Circuits Orchestrate Cortical beta and gamma Band Oscillations." Neuron **96**(6):  
756 1403-1418.e1406.
- 757 Cona, F., M. Lacanna and M. Ursino (2014). "A thalamo-cortical neural mass model for the  
758 simulation of brain rhythms during sleep." J Comput Neurosci **37**(1): 125-148.
- 759 Crone, J. S., M. Schurz, Y. Höller, J. Bergmann, M. Monti, E. Schmid, E. Trinka and M. Kronbichler  
760 (2015). "Impaired consciousness is linked to changes in effective connectivity of the posterior  
761 cingulate cortex within the default mode network." NeuroImage **110**: 101-109.
- 762 Cruikshank, S. J., T. J. Lewis and B. W. Connors (2007). "Synaptic basis for intense thalamocortical  
763 activation of feedforward inhibitory cells in neocortex." Nature Neuroscience **10**: 462.
- 764 Crunelli, V., F. David, M. L. Lorincz and S. W. Hughes (2015). "The thalamocortical network as a  
765 single slow wave-generating unit." Curr Opin Neurobiol **31**: 72-80.
- 766 Dale, A. M., B. Fischl and M. I. Sereno (1999). "Cortical surface-based analysis. I. Segmentation and  
767 surface reconstruction." Neuroimage **9**(2): 179-194.
- 768 David, O. and K. J. Friston (2003). "A neural mass model for MEG/EEG: coupling and neuronal  
769 dynamics." NeuroImage **20**(3): 1743-1755.
- 770 Dehaene, S. and J. P. Changeux (2011). "Experimental and theoretical approaches to conscious  
771 processing." Neuron **70**(2): 200-227.
- 772 Dehaene, S., M. Kerszberg and J. P. Changeux (1998). "A neuronal model of a global workspace in  
773 effortful cognitive tasks." Proc Natl Acad Sci U S A **95**(24): 14529-14534.
- 774 Dehaene, S., L. Naccache, L. Cohen, D. L. Bihan, J. F. Mangin, J. B. Poline and D. Riviere (2001).  
775 "Cerebral mechanisms of word masking and unconscious repetition priming." Nat Neurosci **4**(7):  
776 752-758.

- 777 Desikan, R. S., F. Segonne, B. Fischl, B. T. Quinn, B. C. Dickerson, D. Blacker, R. L. Buckner, A.  
778 M. Dale, R. P. Maguire, B. T. Hyman, M. S. Albert and R. J. Killiany (2006). "An automated  
779 labeling system for subdividing the human cerebral cortex on MRI scans into gyral based regions of  
780 interest." Neuroimage **31**(3): 968-980.
- 781 Di Lazzaro, V. and U. Ziemann (2013). "The contribution of transcranial magnetic stimulation in the  
782 functional evaluation of microcircuits in human motor cortex." Front Neural Circuits **7**: 18.
- 783 Dipoppa, M., A. Ranson, M. Krumin, M. Pachitariu, M. Carandini and K. D. Harris (2018). "Vision  
784 and Locomotion Shape the Interactions between Neuron Types in Mouse Visual Cortex." Neuron  
785 **98**(3): 602-615.e608.
- 786 Esser, S. K., S. Hill and G. Tononi (2009). "Breakdown of effective connectivity during slow wave  
787 sleep: investigating the mechanism underlying a cortical gate using large-scale modeling." J  
788 Neurophysiol **102**(4): 2096-2111.
- 789 Esser, S. K., S. Hill and G. Tononi (2009). "Breakdown of Effective Connectivity During Slow Wave  
790 Sleep: Investigating the Mechanism Underlying a Cortical Gate Using Large-Scale Modeling."  
791 Journal of Neurophysiology **102**(4): 2096-2111.
- 792 Ferrarelli, F., M. Massimini, S. Sarasso, A. Casali, B. A. Riedner, G. Angelini, G. Tononi and R. A.  
793 Pearce (2010). "Breakdown in cortical effective connectivity during midazolam-induced loss of  
794 consciousness." Proceedings of the National Academy of Sciences **107**(6): 2681-2686.
- 795 Ferrarelli, F., M. Massimini, S. Sarasso, A. Casali, B. A. Riedner, G. Angelini, G. Tononi and R. A.  
796 Pearce (2010). "Breakdown in cortical effective connectivity during midazolam-induced loss of  
797 consciousness." Proc Natl Acad Sci U S A **107**(6): 2681-2686.
- 798 Fino, E. and R. Yuste (2011). "Dense Inhibitory Connectivity in Neocortex." Neuron **69**(6): 1188-  
799 1203.
- 800 Fischl, B., M. I. Sereno and A. M. Dale (1999). "Cortical surface-based analysis. II: Inflation,  
801 flattening, and a surface-based coordinate system." Neuroimage **9**(2): 195-207.
- 802 Freeman, W. J. (1978). "Models of the dynamics of neural populations." Electroencephalography and  
803 clinical neurophysiology. Supplement(34): 9-18.
- 804 Fries, P. (2005). "A mechanism for cognitive dynamics: neuronal communication through neuronal  
805 coherence." Trends in Cognitive Sciences **9**(10): 474-480.
- 806 Fries, P. (2009). "Neuronal Gamma-Band Synchronization as a Fundamental Process in Cortical  
807 Computation." Annual Review of Neuroscience **32**(1): 209-224.
- 808 Friston, K. J. (2011). "Functional and Effective Connectivity: A Review." Brain Connectivity **1**(1):  
809 13-36.
- 810 Fu, Y., Jason M. Tucciarone, J. S. Espinosa, N. Sheng, Daniel P. Darcy, Roger A. Nicoll, Z. J. Huang  
811 and Michael P. Stryker (2014). "A Cortical Circuit for Gain Control by Behavioral State." Cell  
812 **156**(6): 1139-1152.
- 813 Funk, C. M., K. Peelman, M. Bellesi, W. Marshall, C. Cirelli and G. Tononi (2017). "Role of  
814 Somatostatin-Positive Cortical Interneurons in the Generation of Sleep Slow Waves." The Journal of  
815 Neuroscience **37**(38): 9132-9148.
- 816 Gentet, L. J., Y. Kremer, H. Taniguchi, Z. J. Huang, J. F. Staiger and C. C. H. Petersen (2012).  
817 "Unique functional properties of somatostatin-expressing GABAergic neurons in mouse barrel  
818 cortex." Nature Neuroscience **15**: 607.

- 819 Gidon, A. and I. Segev (2012). "Principles Governing the Operation of Synaptic Inhibition in  
820 Dendrites." Neuron **75**(2): 330-341.
- 821 Gomez, F., C. Phillips, A. Soddu, M. Boly, P. Boveroux, A. Vanhaudenhuyse, M. A. Bruno, O.  
822 Gosseries, V. Bonhomme, S. Laureys and Q. Noirhomme (2013). "Changes in effective connectivity  
823 by propofol sedation." PLoS One **8**(8): e71370.
- 824 Goncalves, S. I., J. C. de Munck, J. P. Verbunt, F. Bijma, R. M. Heethaar and F. Lopes da Silva  
825 (2003). "In vivo measurement of the brain and skull resistivities using an EIT-based method and  
826 realistic models for the head." IEEE Trans Biomed Eng **50**(6): 754-767.
- 827 Gramfort, A., T. Papadopoulos, E. Olivi and M. Clerc (2010). "OpenMEEG: opensource software for  
828 quasistatic bioelectromagnetics." Biomed Eng Online **9**: 45.
- 829 Hagmann, P., L. Cammoun, X. Gigandet, R. Meuli, C. J. Honey, V. J. Wedeen and O. Sporns (2008).  
830 "Mapping the structural core of human cerebral cortex." PLoS Biol **6**(7): e159.
- 831 Hale, J. R., T. P. White, S. D. Mayhew, R. S. Wilson, D. T. Rollings, S. Khalsa, T. N. Arvanitis and  
832 A. P. Bagshaw (2016). "Altered thalamocortical and intra-thalamic functional connectivity during  
833 light sleep compared with wake." NeuroImage **125**: 657-667.
- 834 Harris, A. Z. and J. A. Gordon (2015). "Long-Range Neural Synchrony in Behavior." Annual Review  
835 of Neuroscience **38**(1): 171-194.
- 836 Harris, K. D. and T. D. Mrsic-Flogel (2013). "Cortical connectivity and sensory coding." Nature **503**:  
837 51.
- 838 Hill, S. and G. Tononi (2005). "Modeling sleep and wakefulness in the thalamocortical system." J  
839 Neurophysiol **93**(3): 1671-1698.
- 840 Holmes, C. J., R. Hoge, L. Collins, R. Woods, A. W. Toga and A. C. Evans (1998). "Enhancement of  
841 MR images using registration for signal averaging." J Comput Assist Tomogr **22**(2): 324-333.
- 842 Hudetz, A. G. (2012). "General anesthesia and human brain connectivity." Brain Connect **2**(6): 291-  
843 302.
- 844 Jansen, B. H. and V. G. Rit (1995). "Electroencephalogram and visual evoked potential generation in  
845 a mathematical model of coupled cortical columns." Biological Cybernetics **73**(4): 357-366.
- 846 Ji, X.-y., B. Zingg, L. Mesik, Z. Xiao, L. I. Zhang and H. W. Tao (2016). "Thalamocortical  
847 Innervation Pattern in Mouse Auditory and Visual Cortex: Laminar and Cell-Type Specificity."  
848 Cerebral Cortex **26**(6): 2612-2625.
- 849 Jin, S.-H. and C. K. Chung (2012). "Messages from the Brain Connectivity Regarding Neural  
850 Correlates of Consciousness." Exp Neurobiol **21**(3): 113-122.
- 851 Kapfer, C., L. L. Glickfeld, B. V. Atallah and M. Scanziani (2007). "Supralinear increase of recurrent  
852 inhibition during sparse activity in the somatosensory cortex." Nature Neuroscience **10**: 743.
- 853 Karnani, M. M., M. Agetsuma and R. Yuste (2014). "A blanket of inhibition: functional inferences  
854 from dense inhibitory connectivity." Current Opinion in Neurobiology **26**: 96-102.
- 855 Kim, S.-P., E. Hwang, J.-H. Kang, S. Kim and J. H. Choi (2012). "Changes in the thalamocortical  
856 connectivity during anesthesia-induced transitions in consciousness." NeuroReport **23**(5): 294-298.
- 857 Koch, C., M. Massimini, M. Boly and G. Tononi (2016). "Neural correlates of consciousness:  
858 progress and problems." Nat Rev Neurosci **17**(5): 307-321.

- 859 Laureys, S. (2004). "Functional neuroimaging in the vegetative state." NeuroRehabilitation **19**(4):  
860 335-341.
- 861 Laureys, S., M. Boly and P. Maquet (2006). "Tracking the recovery of consciousness from coma." J  
862 Clin Invest **116**(7): 1823-1825.
- 863 Laureys, S., S. Goldman, C. Phillips, P. Van Bogaert, J. Aerts, A. Luxen, G. Franck and P. Maquet  
864 (1999). "Impaired effective cortical connectivity in vegetative state: preliminary investigation using  
865 PET." Neuroimage **9**(4): 377-382.
- 866 Lee, J. H. and S. Mihalas (2017). "Visual processing mode switching regulated by VIP cells."  
867 Scientific Reports **7**(1): 1843.
- 868 Lee, S., I. Kruglikov, Z. J. Huang, G. Fishell and B. Rudy (2013). "A disinhibitory circuit mediates  
869 motor integration in the somatosensory cortex." Nature Neuroscience **16**: 1662.
- 870 Lewis, D. A., A. A. Curley, J. R. Glausier and D. W. Volk (2012). "Cortical parvalbumin  
871 interneurons and cognitive dysfunction in schizophrenia." Trends in Neurosciences **35**(1): 57-67.
- 872 Lewis, L. D., J. Voigts, F. J. Flores, L. I. Schmitt, M. A. Wilson, M. M. Halassa and E. N. Brown  
873 (2015). "Thalamic reticular nucleus induces fast and local modulation of arousal state." eLife **4**:  
874 e08760.
- 875 Liu, C., Y. Zhu, F. Liu, J. Wang, H. Li, B. Deng, C. Fietkiewicz and K. A. Loparo (2017). "Neural  
876 mass models describing possible origin of the excessive beta oscillations correlated with  
877 Parkinsonian state." Neural Networks **88**: 65-73.
- 878 Liu, F., J. Wang, C. Liu, H. Li, B. Deng, C. Fietkiewicz and K. A. Loparo (2016). "A neural mass  
879 model of basal ganglia nuclei simulates pathological beta rhythm in Parkinson's disease." Chaos: An  
880 Interdisciplinary Journal of Nonlinear Science **26**(12): 123113.
- 881 Llinas, R., U. Ribary, D. Contreras and C. Pedroarena (1998). "The neuronal basis for  
882 consciousness." Philos Trans R Soc Lond B Biol Sci **353**(1377): 1841-1849.
- 883 Lopes da Silva, F. H., A. van Rotterdam, P. Barts, E. van Heusden and W. Burr (1976). Models of  
884 Neuronal Populations: The Basic Mechanisms of Rhythmicity. Progress in Brain Research. M. A.  
885 Corner and D. F. Swaab, Elsevier. **45**: 281-308.
- 886 Lovett-Barron, M., G. F. Turi, P. Kaifosh, P. H. Lee, F. Bolze, X.-H. Sun, J.-F. Nicoud, B. V.  
887 Zemelman, S. M. Sternson and A. Losonczy (2012). "Regulation of neuronal input transformations  
888 by tunable dendritic inhibition." Nature Neuroscience **15**: 423.
- 889 Ma, W.-p., B.-h. Liu, Y.-t. Li, Z. Josh Huang, L. I. Zhang and H. W. Tao (2010). "Visual  
890 Representations by Cortical Somatostatin Inhibitory Neurons—Selective But with Weak and Delayed  
891 Responses." The Journal of Neuroscience **30**(43): 14371-14379.
- 892 Maex, R. and E. De Schutter (2007). "Mechanism of spontaneous and self-sustained oscillations in  
893 networks connected through axo-axonal gap junctions." European Journal of Neuroscience **25**(11):  
894 3347-3358.
- 895 Massimini, M., F. Ferrarelli, M. J. Murphy, R. Huber, B. A. Riedner, S. Casarotto and G. Tononi  
896 (2010). "Cortical reactivity and effective connectivity during REM sleep in humans." Cognitive  
897 Neuroscience **1**(3): 176-183.
- 898 Mina, F., P. Benquet, A. Pasnicu, A. Biraben and F. Wendling (2013). "Modulation of epileptic  
899 activity by deep brain stimulation: a model-based study of frequency-dependent effects." Frontiers in  
900 Computational Neuroscience **7**(94).

- 901 Miranda, P. C., M. Hallett and P. J. Basser (2003). "The electric field induced in the brain by  
902 magnetic stimulation: a 3-D finite-element analysis of the effect of tissue heterogeneity and  
903 anisotropy." IEEE Trans Biomed Eng **50**(9): 1074-1085.
- 904 Modolo, J., M. Hassan, G. Ruffini and A. Legros (2018). "Probing the circuits of conscious  
905 perception with magnetophosphenes." preprint:  
906 <https://www.biorxiv.org/content/early/2018/2011/2015/449769>.
- 907 Molae-Ardekani, B., P. Benquet, F. Bartolomei and F. Wendling (2010). "Computational modeling  
908 of high-frequency oscillations at the onset of neocortical partial seizures: From 'altered structure' to  
909 'dysfunction'." NeuroImage **52**(3): 1109-1122.
- 910 Nakajima, M. and M. M. Halassa (2017). "Thalamic control of functional cortical connectivity." Curr  
911 Opin Neurobiol **44**: 127-131.
- 912 Neske, G. T. (2015). "The Slow Oscillation in Cortical and Thalamic Networks: Mechanisms and  
913 Functions." Front Neural Circuits **9**: 88.
- 914 Ni Mhuirheartaigh, R., C. Warnaby, R. Rogers, S. Jbabdi and I. Tracey (2013). "Slow-wave activity  
915 saturation and thalamocortical isolation during propofol anesthesia in humans." Sci Transl Med  
916 **5**(208): 208ra148.
- 917 Nunez, P. L. (1974). "The brain wave equation: a model for the EEG." Mathematical Biosciences  
918 **21**(3): 279-297.
- 919 Owen, A. M., M. R. Coleman, M. Boly, M. H. Davis, S. Laureys and J. D. Pickard (2006).  
920 "Detecting awareness in the vegetative state." Science **313**(5792): 1402.
- 921 Paulus, W. and J. C. Rothwell (2016). "Membrane resistance and shunting inhibition: where  
922 biophysics meets state-dependent human neurophysiology." The Journal of Physiology **594**(10):  
923 2719-2728.
- 924 Pfeffer, Carsten K. (2014). "Inhibitory Neurons: Vip Cells Hit the Brake on Inhibition." Current  
925 Biology **24**(1): R18-R20.
- 926 Pi, H.-J., B. Hangya, D. Kvitsiani, J. I. Sanders, Z. J. Huang and A. Kepecs (2013). "Cortical  
927 interneurons that specialize in disinhibitory control." Nature **503**: 521.
- 928 Povysheva, N. V., A. V. Zaitsev, D. C. Rotaru, G. Gonzalez-Burgos, D. A. Lewis and L. S. Krimer  
929 (2008). "Parvalbumin-Positive Basket Interneurons in Monkey and Rat Prefrontal Cortex." Journal of  
930 Neurophysiology **100**(4): 2348-2360.
- 931 Roberts, J. A. and P. A. Robinson (2012). "Corticothalamic dynamics: Structure of parameter space,  
932 spectra, instabilities, and reduced model." Physical Review E **85**(1): 011910.
- 933 Rudy, B., G. Fishell, S. Lee and J. Hjerling-Leffler (2011). "Three groups of interneurons account for  
934 nearly 100% of neocortical GABAergic neurons." Developmental Neurobiology **71**(1): 45-61.
- 935 Ruffini, G. (2017). "An algorithmic information theory of consciousness." Neurosci Conscious  
936 **2017**(1): nix019.
- 937 Saalman, Y. B. (2014). "Intralaminar and medial thalamic influence on cortical synchrony,  
938 information transmission and cognition." Frontiers in Systems Neuroscience **8**(83).
- 939 Schoenberg, P. L. A., A. Ruf, J. Churchill, D. P. Brown and J. A. Brewer (2018). "Mapping complex  
940 mind states: EEG neural substrates of meditative unified compassionate awareness." Conscious Cogn  
941 **57**: 41-53.

- 942 Sen Bhattacharya, B., Y. Cakir, N. Serap-Sengor, L. Maguire and D. Coyle (2013). "Model-based  
943 bifurcation and power spectral analyses of thalamocortical alpha rhythm slowing in Alzheimer's  
944 Disease." Neurocomputing **115**: 11-22.
- 945 Silberberg, G. and H. Markram (2007). "Disynaptic Inhibition between Neocortical Pyramidal Cells  
946 Mediated by Martinotti Cells." Neuron **53**(5): 735-746.
- 947 Sohn, J., S. Okamoto, N. Kataoka, T. Kaneko, K. Nakamura and H. Hioki (2016). "Differential  
948 Inputs to the Perisomatic and Distal-Dendritic Compartments of VIP-Positive Neurons in Layer 2/3  
949 of the Mouse Barrel Cortex." Frontiers in Neuroanatomy **10**(124).
- 950 Sotero, R. C., N. J. Trujillo-Barreto, Y. Iturria-Medina, F. Carbonell and J. C. Jimenez (2007).  
951 "Realistically Coupled Neural Mass Models Can Generate EEG Rhythms." Neural Comput. **19**(2):  
952 478-512.
- 953 Suffczynski, P., S. Kalitzin and F. H. Lopes Da Silva (2004). "Dynamics of non-convulsive epileptic  
954 phenomena modeled by a bistable neuronal network." Neuroscience **126**(2): 467-484.
- 955 Tadel, F., S. Baillet, J. C. Mosher, D. Pantazis and R. M. Leahy (2011). "Brainstorm: a user-friendly  
956 application for MEG/EEG analysis." Comput Intell Neurosci **2011**: 879716.
- 957 Tan, Z., H. Hu, Z. J. Huang and A. Agmon (2008). "Robust but delayed thalamocortical activation of  
958 dendritic-targeting inhibitory interneurons." Proceedings of the National Academy of Sciences  
959 **105**(6): 2187-2192.
- 960 Timofeev, I. and M. Steriade (1996). "Low-frequency rhythms in the thalamus of intact-cortex and  
961 decorticated cats." J Neurophysiol **76**(6): 4152-4168.
- 962 Tononi, G. (2004). "An information integration theory of consciousness." BMC Neuroscience **5**(1):  
963 42.
- 964 Tononi, G. (2012). "Integrated information theory of consciousness: an updated account." Archives  
965 italiennes de biologie **150 2-3**: 56-90.
- 966 Tononi, G. and G. M. Edelman (1998). "Consciousness and complexity." Science **282**(5395): 1846-  
967 1851.
- 968 Tononi, G. and O. Sporns (2003). "Measuring information integration." BMC Neuroscience **4**(1): 31.
- 969 Traub, R. D., D. Contreras, M. O. Cunningham, H. Murray, F. E. N. LeBeau, A. Roopun, A. Bibbig,  
970 W. B. Wilent, M. J. Higley and M. A. Whittington (2005). "Single-Column Thalamocortical Network  
971 Model Exhibiting Gamma Oscillations, Sleep Spindles, and Epileptogenic Bursts." Journal of  
972 Neurophysiology **93**(4): 2194-2232.
- 973 Tremblay, R., S. Lee and B. Rudy (2016). "GABAergic Interneurons in the Neocortex: From Cellular  
974 Properties to Circuits." Neuron **91**(2): 260-292.
- 975 Urban-Ciecko, J. and A. L. Barth (2016). "Somatostatin-expressing neurons in cortical networks."  
976 Nature Reviews Neuroscience **17**: 401-409.
- 977 Ursino, M., F. Cona and M. Zavaglia (2010). "The generation of rhythms within a cortical region:  
978 Analysis of a neural mass model." NeuroImage **52**(3): 1080-1094.
- 979 Usami, K., R. Matsumoto, K. Kobayashi, T. Hitomi, A. Shimotake, T. Kikuchi, M. Matsushashi, T.  
980 Kunieda, N. Mikuni, S. Miyamoto, H. Fukuyama, R. Takahashi and A. Ikeda (2015). "Sleep  
981 modulates cortical connectivity and excitability in humans: Direct evidence from neural activity  
982 induced by single-pulse electrical stimulation." Human Brain Mapping **36**(11): 4714-4729.

- 983 van Vugt, B., B. Dagnino, D. Vartak, H. Safaai, S. Panzeri, S. Dehaene and P. R. Roelfsema (2018).  
984 "The threshold for conscious report: Signal loss and response bias in visual and frontal cortex."  
985 Science **360**(6388): 537-542.
- 986 Varga, C., M. Oijala, J. Lish, G. G. Szabo, M. Bezaire, I. Marchionni, P. Golshani and I. Soltesz  
987 (2014). "Functional fission of parvalbumin interneuron classes during fast network events." eLife **3**:  
988 e04006.
- 989 Varotto, G., P. Fazio, D. Rossi Sebastiano, D. Duran, L. D'Incerti, E. Parati, D. Sattin, M. Leonardi,  
990 S. Franceschetti and F. Panzica (2014). "Altered resting state effective connectivity in long-standing  
991 vegetative state patients: An EEG study." Clinical Neurophysiology **125**(1): 63-68.
- 992 Walker, F., M. Möck, M. Feyerabend, J. Guy, R. J. Wagener, D. Schubert, J. F. Staiger and M. Witte  
993 (2016). "Parvalbumin- and vasoactive intestinal polypeptide-expressing neocortical interneurons  
994 impose differential inhibition on Martinotti cells." Nature Communications **7**: 13664.
- 995 Wang, X.-J. and G. Buzsáki (1996). "Gamma Oscillation by Synaptic Inhibition in a Hippocampal  
996 Interneuronal Network Model." The Journal of Neuroscience **16**(20): 6402-6413.
- 997 Ward, L. M. (2013). "The thalamus: gateway to the mind." Wiley Interdiscip Rev Cogn Sci **4**(6):  
998 609-622.
- 999 Wendling, F., F. Bartolomei, J. J. Bellanger and P. Chauvel (2002). "Epileptic fast activity can be  
1000 explained by a model of impaired GABAergic dendritic inhibition." Eur J Neurosci **15**(9): 1499-  
1001 1508.
- 1002 Wendling, F., F. Bartolomei, J. J. Bellanger and P. Chauvel (2002). "Epileptic fast activity can be  
1003 explained by a model of impaired GABAergic dendritic inhibition." European Journal of  
1004 Neuroscience **15**(9): 1499-1508.
- 1005 Wendling, F., P. Benquet, F. Bartolomei and V. Jirsa (2016). "Computational models of epileptiform  
1006 activity." Journal of Neuroscience Methods **260**: 233-251.
- 1007 Whittington, M. A., R. D. Traub, N. Kopell, B. Ermentrout and E. H. Buhl (2000). "Inhibition-based  
1008 rhythms: experimental and mathematical observations on network dynamics." International Journal  
1009 of Psychophysiology **38**(3): 315-336.
- 1010 Williams, L. E. and A. Holtmaat (2018). "Higher-Order Thalamocortical Inputs Gate Synaptic Long-  
1011 Term Potentiation via Disinhibition." Neuron.
- 1012 Wilson, H. R. and J. D. Cowan (1973). "A mathematical theory of the functional dynamics of cortical  
1013 and thalamic nervous tissue." Kybernetik **13**(2): 55-80.
- 1014 Womelsdorf, T., T. A. Valiante, N. T. Sahin, K. J. Miller and P. Tiesinga (2014). "Dynamic circuit  
1015 motifs underlying rhythmic gain control, gating and integration." Nature Neuroscience **17**: 1031.
- 1016 Yang, G. R., J. D. Murray and X.-J. Wang (2016). "A dendritic disinhibitory circuit mechanism for  
1017 pathway-specific gating." Nature Communications **7**: 12815.
- 1018 Yang, W., Y. Carrasquillo, B. M. Hooks, J. M. Nerbonne and A. Burkhalter (2013). "Distinct  
1019 Balance of Excitation and Inhibition in an Interareal Feedforward and Feedback Circuit of Mouse  
1020 Visual Cortex." The Journal of Neuroscience **33**(44): 17373-17384.
- 1021
